# Supplementary material for: Mass transport-enhanced electrodeposition of Ni–S–P–O films on nickel foam for electrochemical water splitting
Source: Royal Society of Chemistry journal article supplement (doi:10.1039/d0ta12097a), 2021-01-01
Supplement: d0ta12097a1.pdf [file d0ta12097a1.pdf]

## Electronic Supplementary Information

# Mass Transport-Enhanced Electrodeposition of Ni-S-P-O Films on Nickel Foam for Electrochemical Water Splitting

*Raul A. Marquez-Montes<sup>†</sup>, Kenta Kawashima<sup>†</sup>, Yoon Jun Son<sup>††</sup>, Jason A. Weeks<sup>†</sup>, Ho-Hyun  
Sun<sup>††</sup>, Hugo Celio<sup>‡</sup>, Víctor H. Ramos-Sánchez<sup>‡‡</sup> and C. Buddie Mullins<sup>†,††,‡,§,§§,\*</sup>*

<sup>†</sup> Department of Chemistry, The University of Texas at Austin, Austin, Texas 78712, United States.

<sup>††</sup> McKetta Department of Chemical Engineering, The University of Texas at Austin, Austin, Texas  
78712, United States.

<sup>‡</sup> Texas Materials Institute, The University of Texas at Austin, Texas 78712, United States.

<sup>‡‡</sup> Facultad de Ciencias Químicas, Universidad Autónoma de Chihuahua, Chihuahua, Chihuahua 31125,  
México.

<sup>§</sup> Center for Electrochemistry, The University of Texas at Austin, Austin, Texas 78712, United States.

<sup>§§</sup> H2@UT, The University of Texas at Austin, Texas 78712, United States.

\* Corresponding author: [mullins@che.utexas.edu](mailto:mullins@che.utexas.edu)

Number of pages: 35

Number of figures: 26

Number of tables: 6

## Detailed Experimental Methods

### *Cleaning of NF substrates*

NF pieces ( $40 \times 30 \times 1.6$  mm) were cleaned in 50 mL of the following solutions while in an ultrasonic bath for 15 min each: (1) acetone, (2) ethanol, (3) 3 M HCl, and (4) deionized water.

### *Calculation of faradaic efficiencies (FEs)*

For oxygen production, FEs were estimated as depicted in Equation S1:

$$FE = \frac{n_{O_2} \cdot z \cdot F \cdot (1000)}{j \cdot A \cdot t} (100) \quad (S1)$$

where  $n_{O_2}$  represents the number of moles of  $O_2$  generated every 2 h (according to water displacement in a 50 mL burette every 2 h),  $F$  is Faraday's constant ( $96485.3 \text{ C} \cdot \text{mol}^{-1}$ ),  $z$  is the number of electrons transferred (4 for  $O_2$ ),  $j$  is the applied current density ( $10 \text{ mA} \cdot \text{cm}^{-2}$ ),  $A$  is the geometric electrode area ( $12 \text{ cm}^2$ ) and  $t$  the time in seconds (7200 seconds). For hydrogen production, FEs were estimated as follows:

$$FE = \frac{n_{H_2} \cdot z \cdot F \cdot (1000)}{j \cdot A \cdot t} (100) \quad (S2)$$

where  $n_{H_2}$  is the number of moles of  $H_2$ . In this case,  $z$  equals 2 for  $H_2$  production, and  $t$  was always equal to 7200 seconds.

### *Electrodeposition in a conventional electrochemical cell*

The electrodes were fixed at a constant separation (1 cm) using alligator clips and introduced vertically in a 250 mL beaker with ~200 mL of plating bath. The solution was mixed with a magnetic stir bar (1 cm) at 1200 rpm. The beaker was placed on top of a hotplate at  $25^\circ\text{C}$ .

## Supplementary Tables and Figures

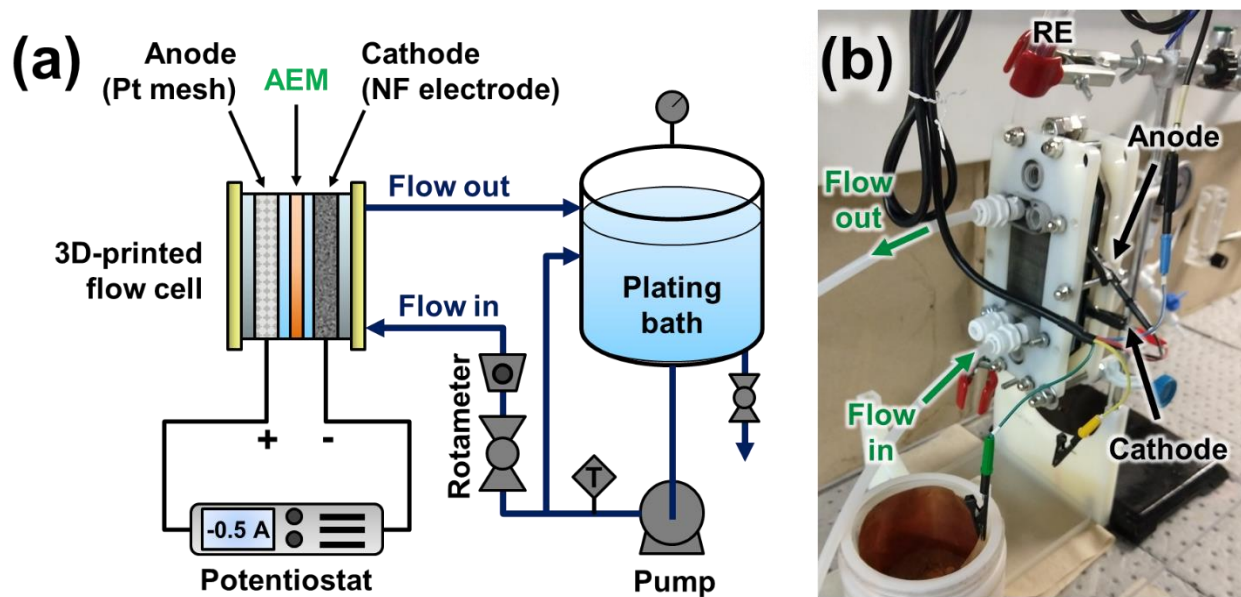

**Figure S1.** Flow cell experimental configuration: (a) flow scheme and electrodeposition configuration and (b) photo of the assembled electrochemical flow cell.

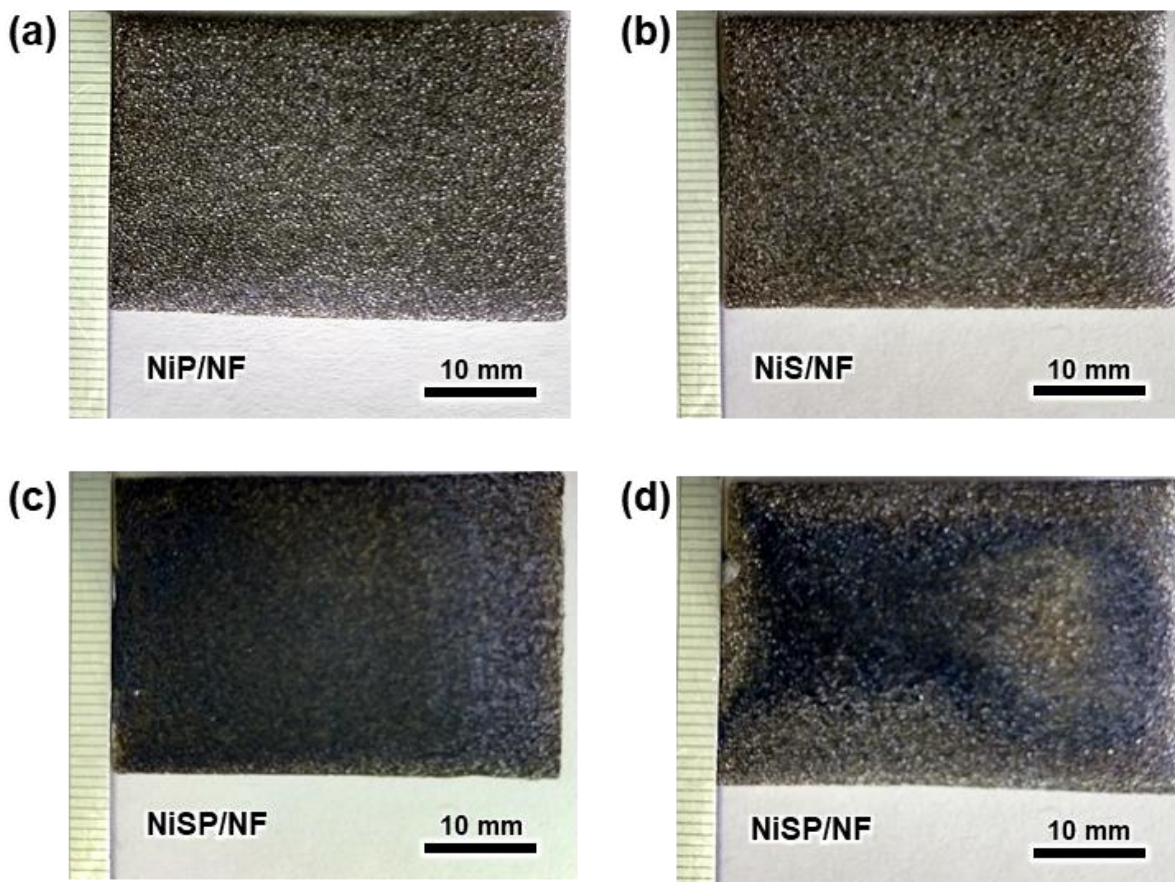

**Figure S2.** Digital photos of the as-prepared NF electrodes obtained under continuous forced flow ( $6 \text{ L} \cdot \text{h}^{-1}$ ) in the flow cell: (a) NiP/NF, (b) NiS/NF and (c) NiSP/NF; (d) NiSP/NF electrode prepared with magnetic stirring (1200 rpm) in a conventional electrochemical cell. Conditions: electrodeposition during 30 min at  $-50 \text{ mA} \cdot \text{cm}^{-2}$ .

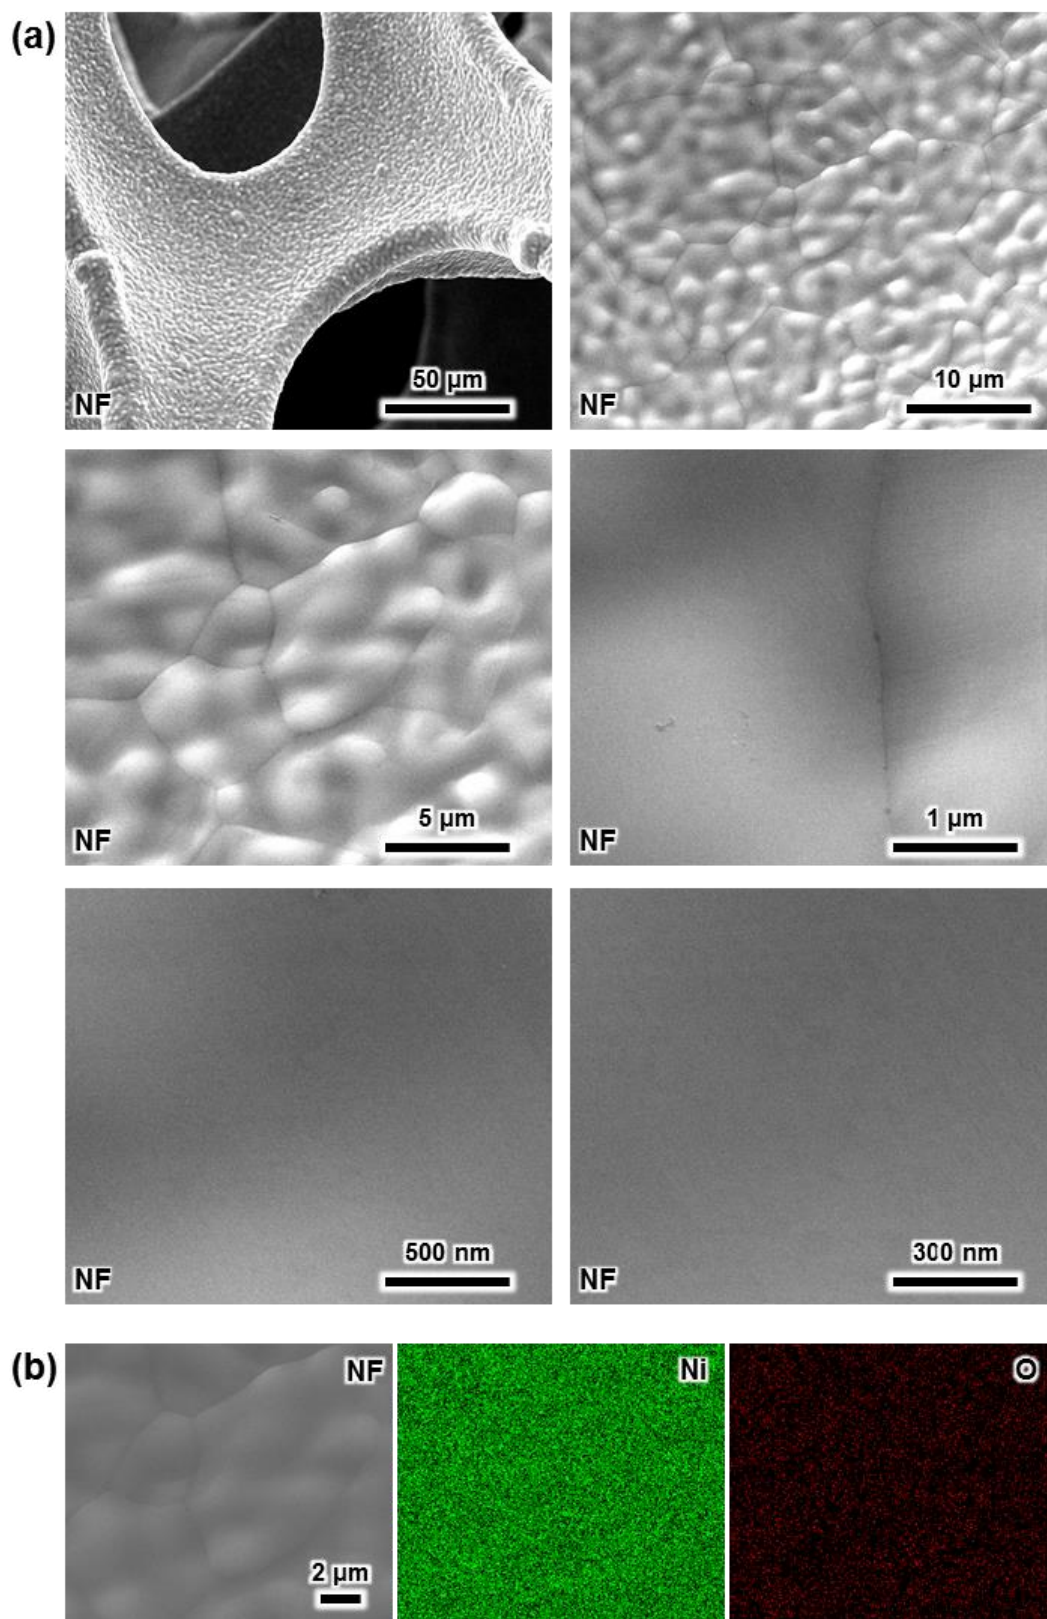

**Figure S3.** Physicochemical characterization of pristine nickel foam sample: (a) SEM images at different magnifications and (b) elemental mappings.

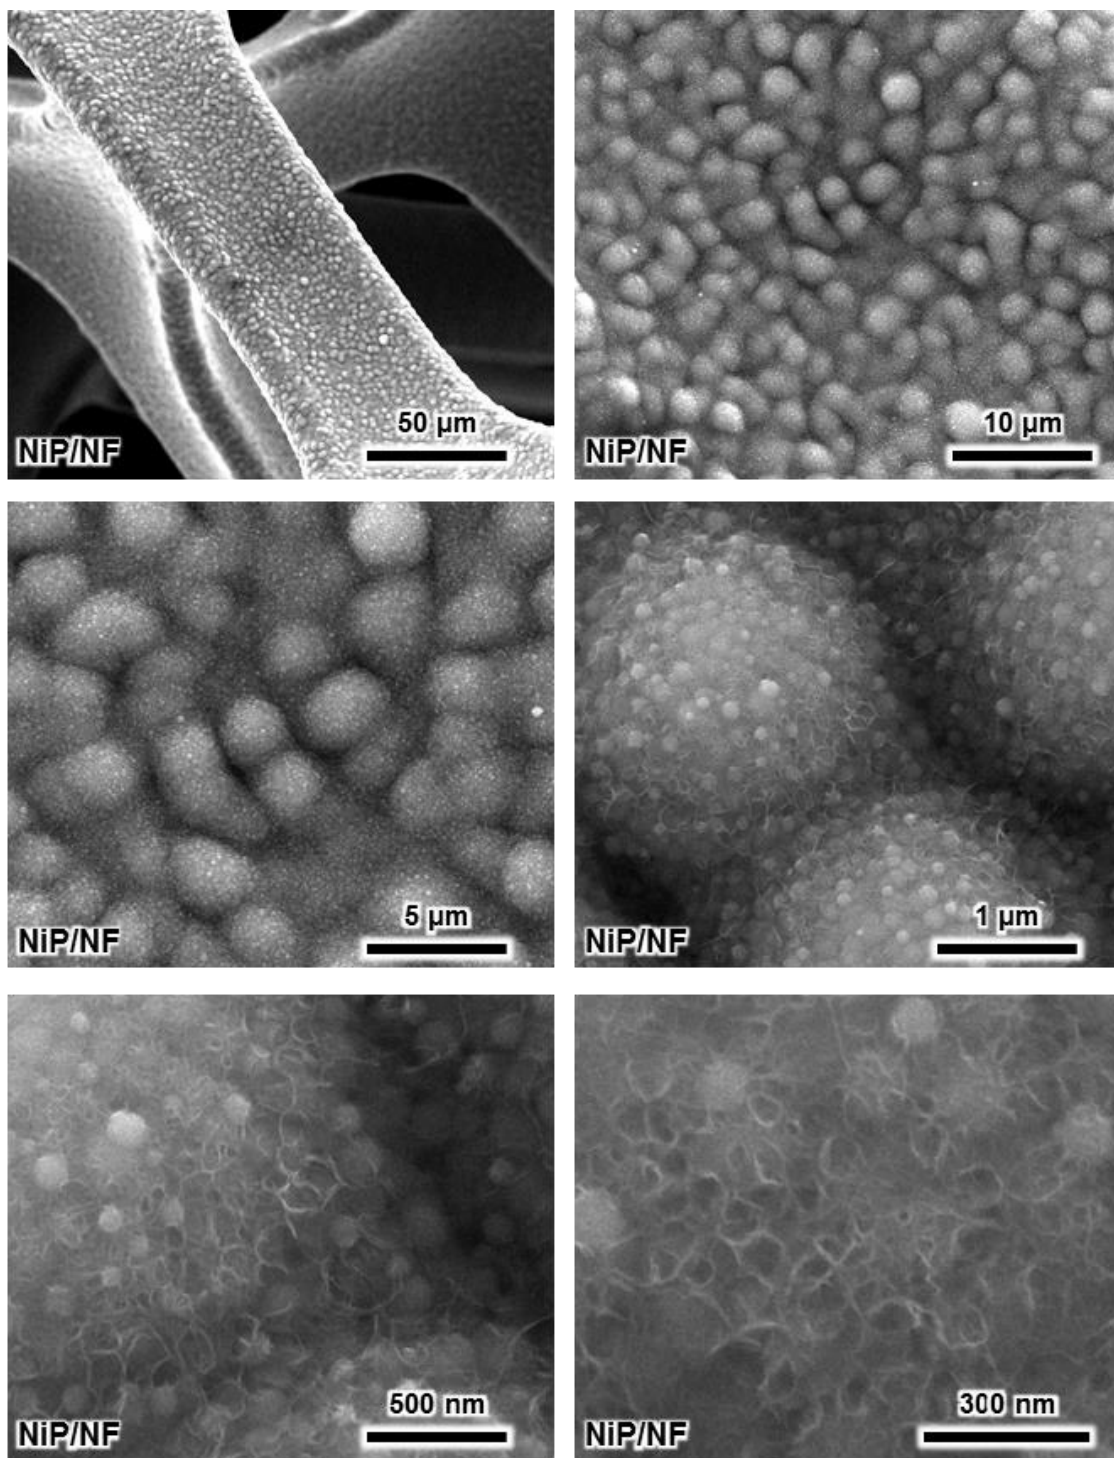

**Figure S4.** SEM images of the pristine NiP/NF electrode at different magnifications.

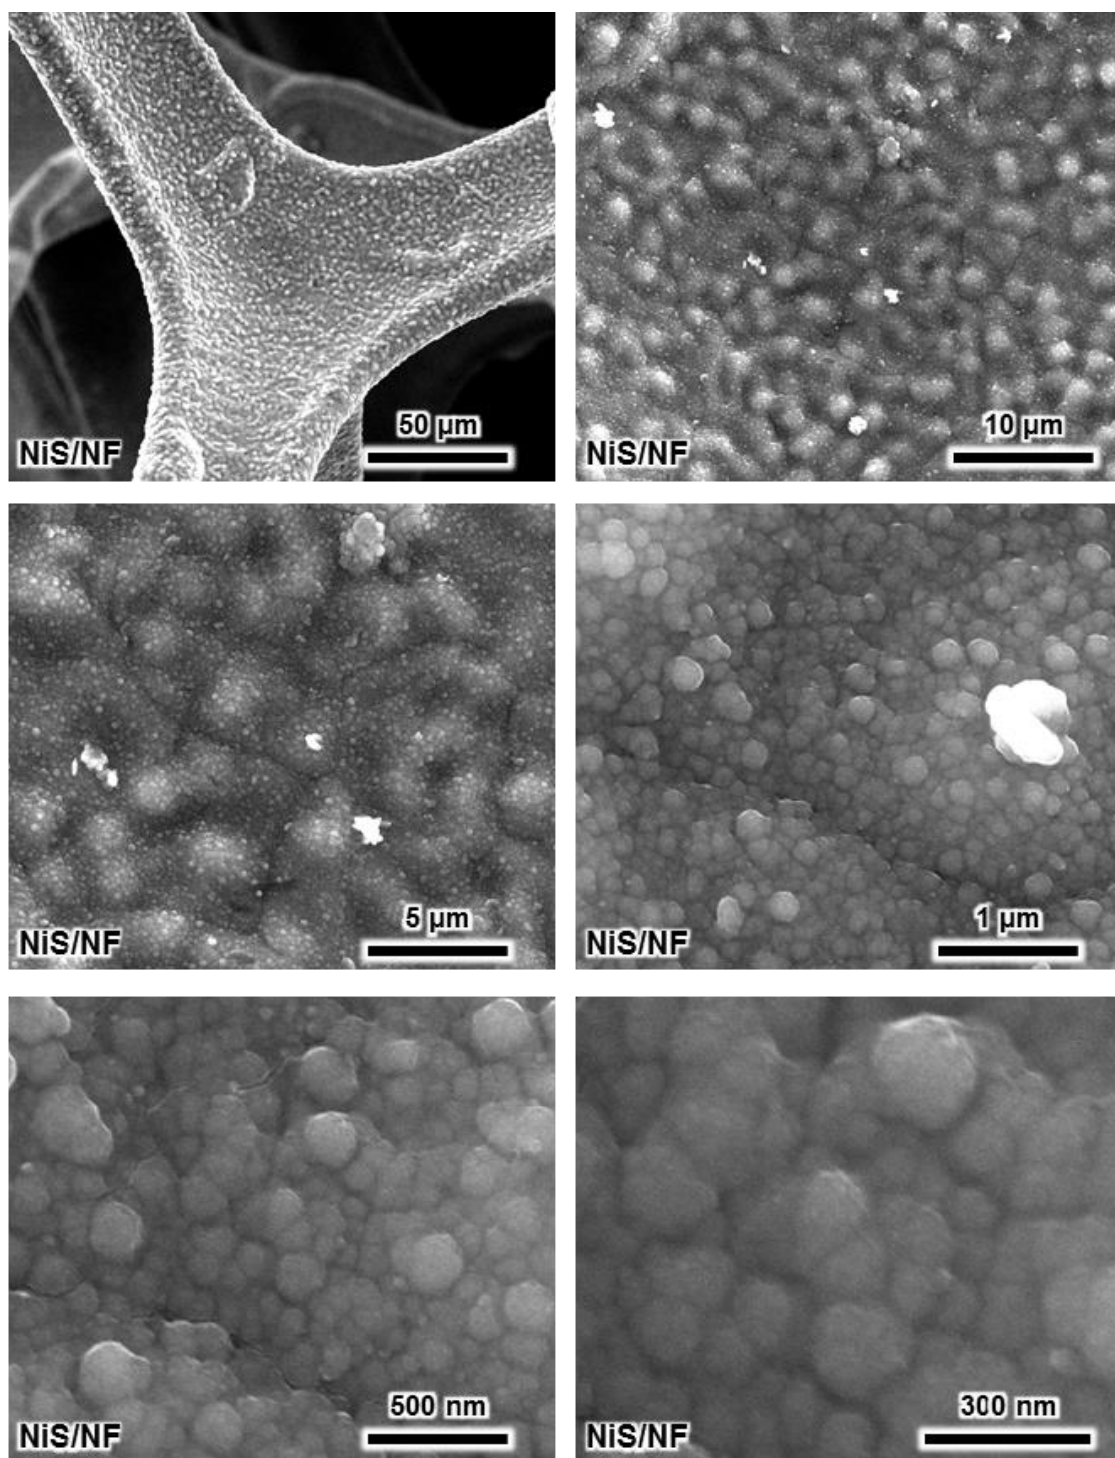

**Figure S5.** SEM images of the pristine NiS/NF electrode at different magnifications.

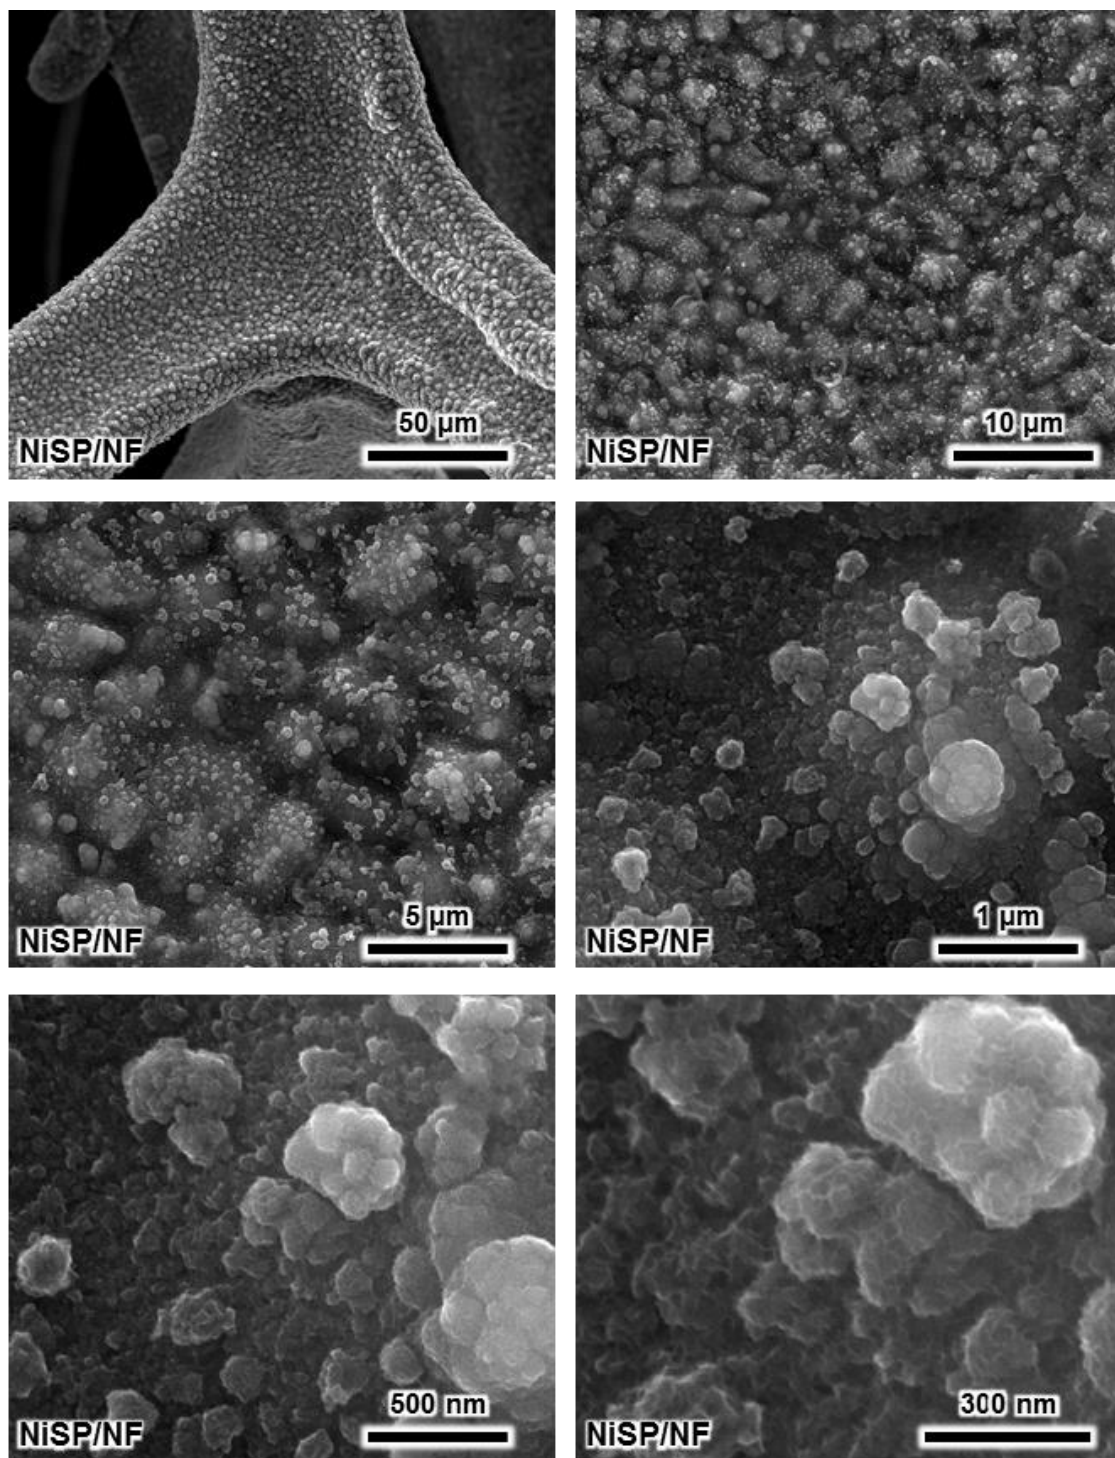

**Figure S6.** SEM images of the pristine NiSP/NF electrode at different magnifications.

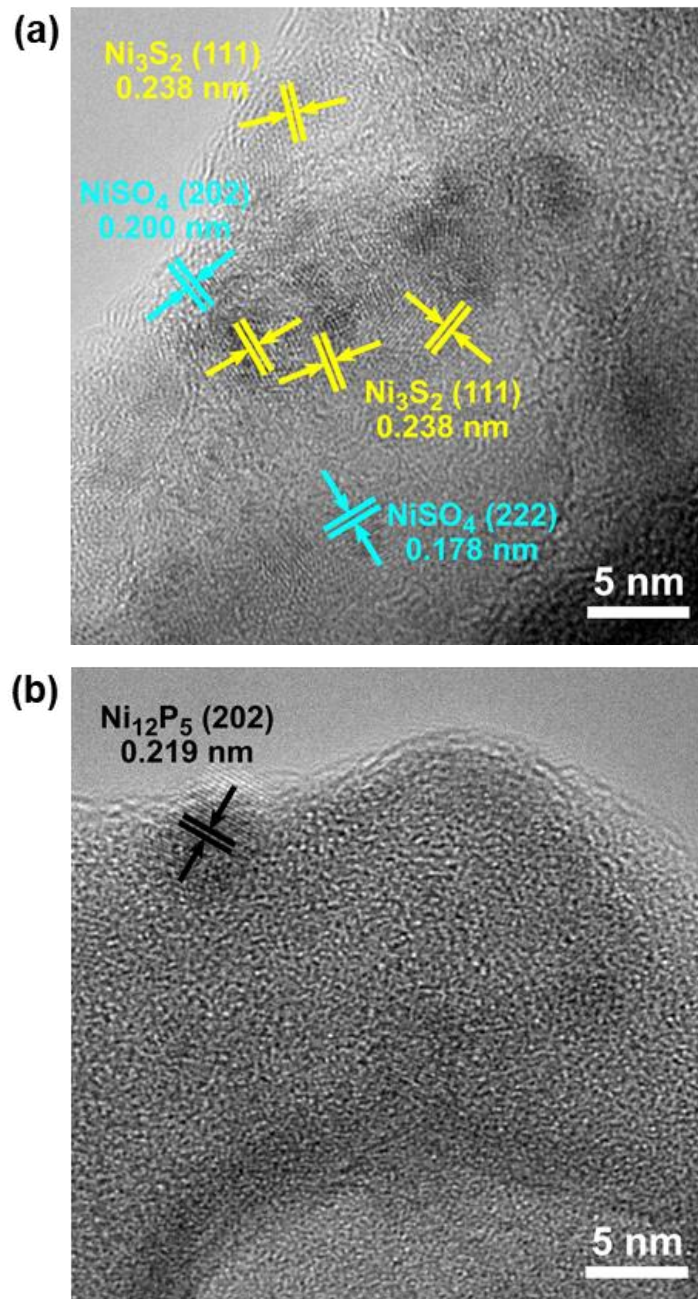

**Figure S7.** Additional high-resolution TEM images of (a) NiS/NF and (b) NiP/NF samples.

**Table S1.** Comparison of the OER performance in alkaline media (1 M KOH) of different S-P electrocatalytic films prepared by electrodeposition.

| Material                                | Substrate    | Mass loading<br>(mg cm <sup>-2</sup> ) | $\eta_{10}$<br>(mV) | $\eta_{50}$<br>(mV) | $\eta_{100}$<br>(mV) | Tafel slope<br>(mV dec <sup>-1</sup> ) | Ref.      |
|-----------------------------------------|--------------|----------------------------------------|---------------------|---------------------|----------------------|----------------------------------------|-----------|
| NiCoP-NiCoSe <sub>2</sub>               | Carbon cloth | 0.073                                  | 243                 | ~270                | ~290                 | 52                                     | 1         |
| NiCoP                                   | Carbon cloth | -                                      | 275                 | ~315                | ~330                 | 87                                     | 1         |
| Ni-P                                    | Ni foam      | -                                      | ~255                | ~330                | 386                  | 88                                     | 2         |
| Ni-S                                    | Ni foam      | -                                      | -                   | ~325                | 370                  | 87                                     | 2         |
| Ni-S-P                                  | Ni foam      | -                                      | 219                 | ~320                | 358                  | 82                                     | 2         |
| CoP-MNA                                 | Ni foam      | 6.2                                    | 290                 | ~330                | ~365                 | 65                                     | 3         |
| Ni <sub>0.51</sub> Co <sub>0.49</sub> P | Ni foam      | -                                      | 239                 | ~290                | ~300                 | 45                                     | 4         |
| NiP                                     | Ni foam      | -                                      | 362                 | ~430                | ~460                 | 112                                    | 4         |
| CoP                                     | Ni foam      | -                                      | 329                 | ~370                | ~390                 | 77                                     | 4         |
| Ni-P                                    | Carbon fiber | 14.2                                   | ~150                | ~310                | -                    | 73                                     | 5         |
| Ni-Fe-Co-S                              | Cu foil      | -                                      | 207                 | ~260                | 272                  | 63                                     | 6         |
| Ni-Fe-S                                 | Cu foil      | -                                      | 225                 | ~280                | 292                  | 43                                     | 6         |
| Ni-Co-S                                 | Cu foil      | -                                      | 266                 | ~320                | 360                  | 92                                     | 6         |
| Ni-S                                    | Cu foil      | -                                      | 289                 | ~400                | 419                  | 115                                    | 6         |
| Co-S                                    | Ti mesh      | -                                      | 361                 | ~400                | ~430                 | 64                                     | 7         |
| CoS-A                                   | Carbon cloth | ~1.6                                   | 390                 | ~480                | ~570                 | -                                      | 8         |
| CoNiP                                   | Ni foam      | -                                      | ~310                | ~340                | ~390                 | ~93                                    | 9         |
| NiP <sub>x</sub>                        | Carbon fiber | ~4.3                                   | 200                 | ~320                | ~430                 | 55                                     | 10        |
| Co~ <sub>70</sub> P~ <sub>30</sub>      | Cu foil      | -                                      | 358                 | ~420                | -                    | -                                      | 11        |
| NiS                                     | Ni foam      | ~3.1                                   | 294                 | 453                 | 575                  | 168                                    | This work |
| NiP                                     | Ni foam      | ~2.5                                   | 325                 | 501                 | 695                  | 108                                    | This work |
| NiSP                                    | Ni foam      | ~4.8                                   | 259                 | 341                 | 395                  | 99                                     | This work |

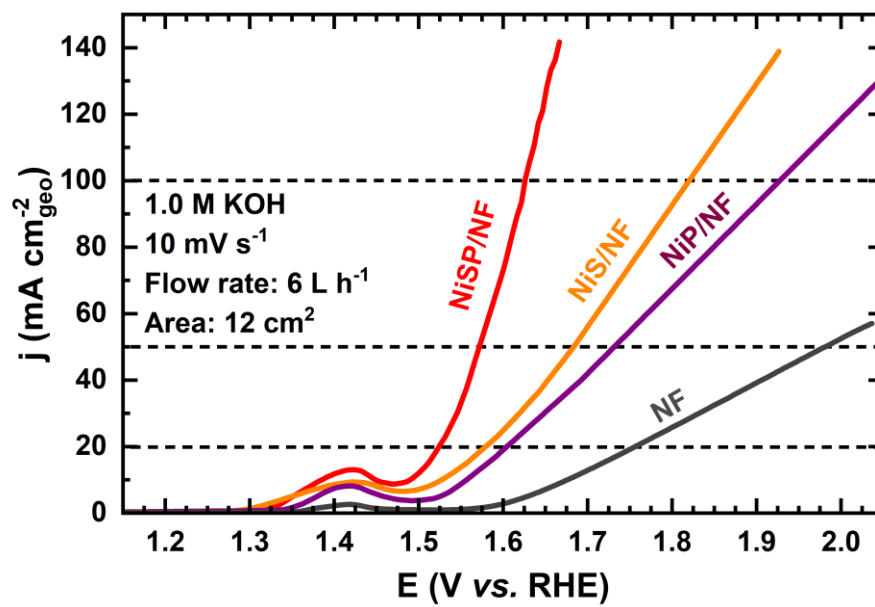

**Figure S8.** OER polarization curves of the as-prepared electrocatalytic films at higher current densities.

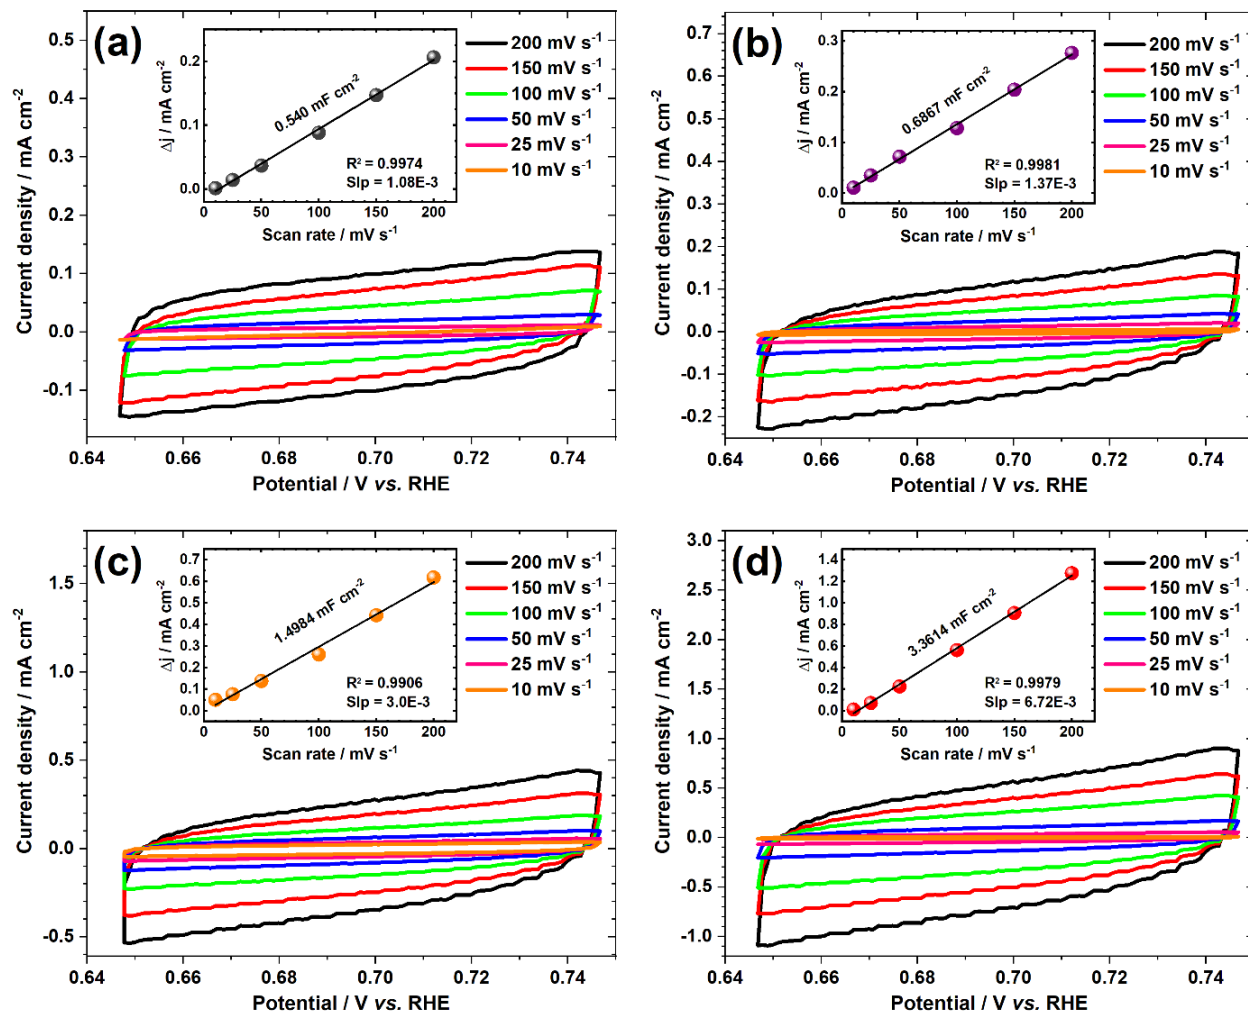

**Figure S9.** ECSA estimation of the as-prepared electrodes: (a) bare NF, (b) NiP/NF, (c) NiS/NF, and (d) NiSP/NF.

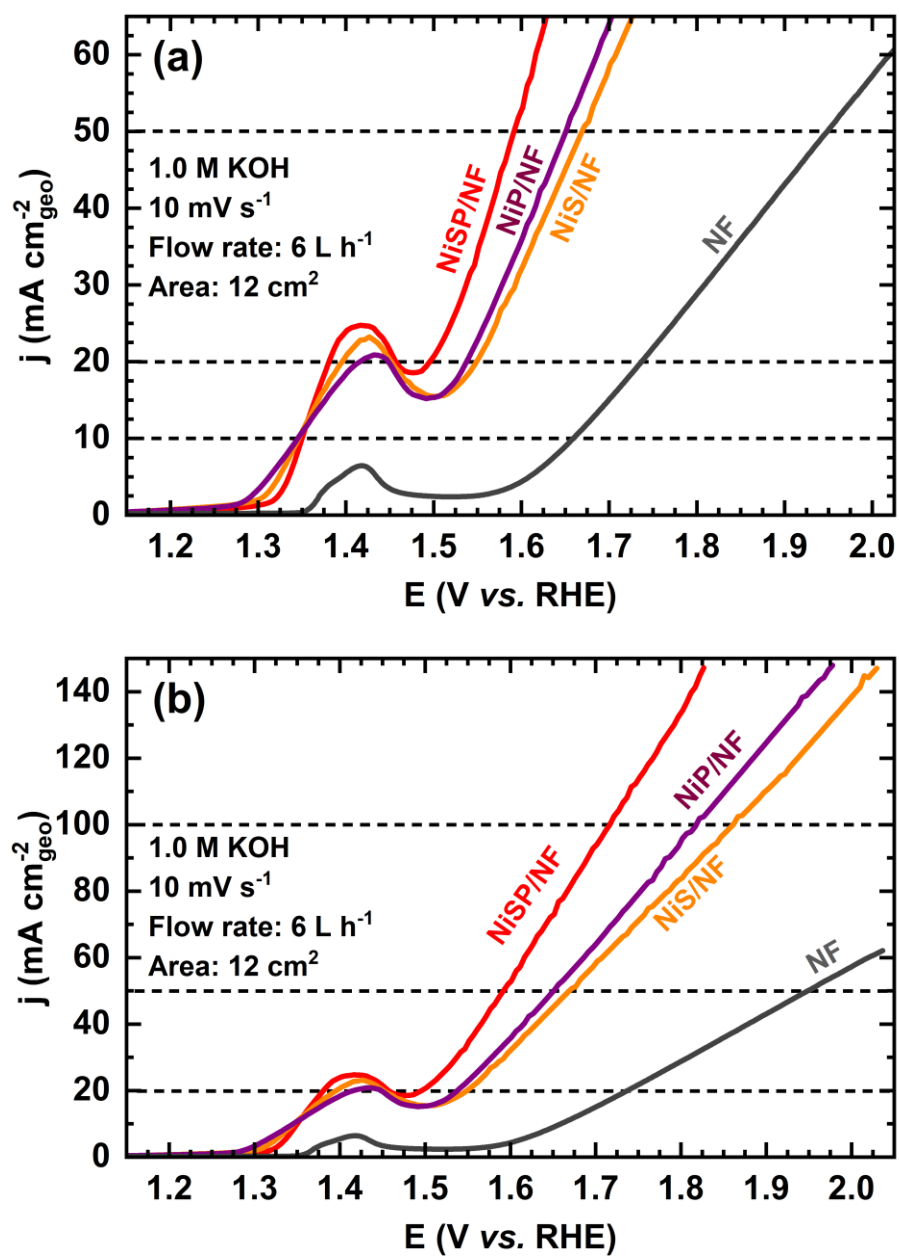

**Figure S10.** OER polarization curves of the evaluated electrocatalytic films after 20 h chronopotentiometric tests at  $20 \text{ mA} \cdot \text{cm}^{-2}$ : (a) close-up for low current densities and (b) high current densities.

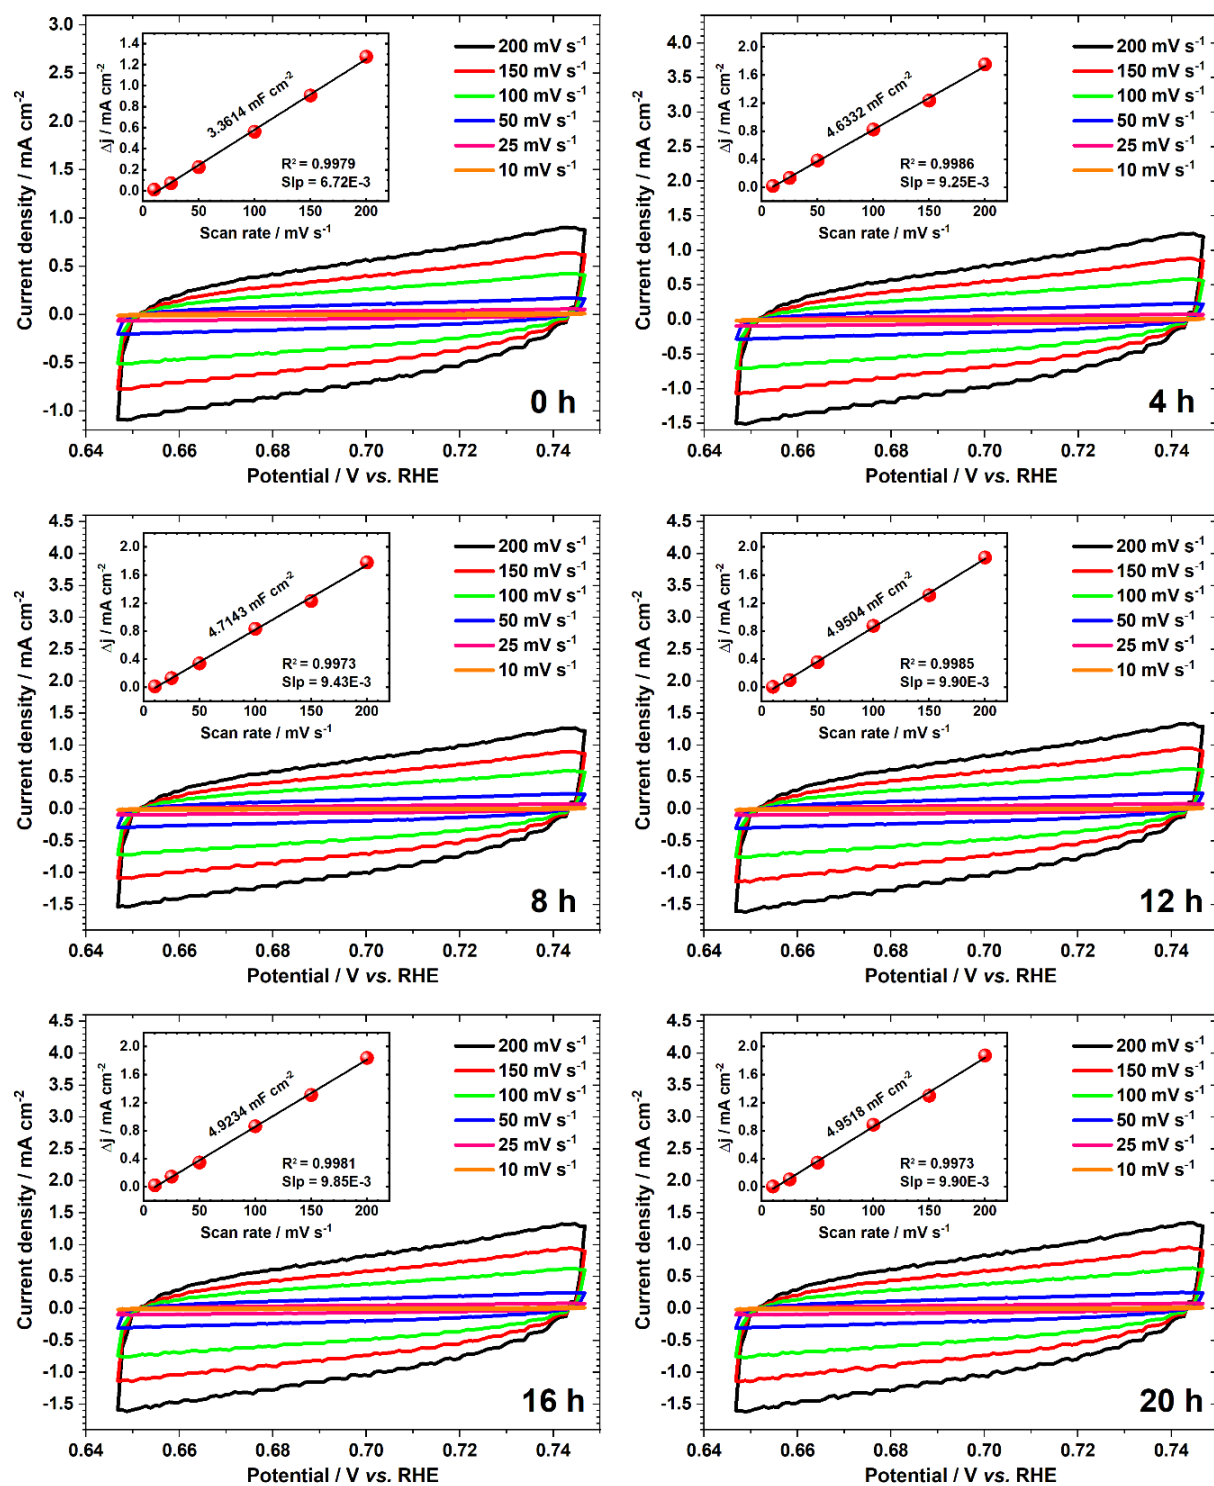

**Figure S11.** CV scans used to monitor the ECSA of the NiSP/NF electrode during OER stability tests.

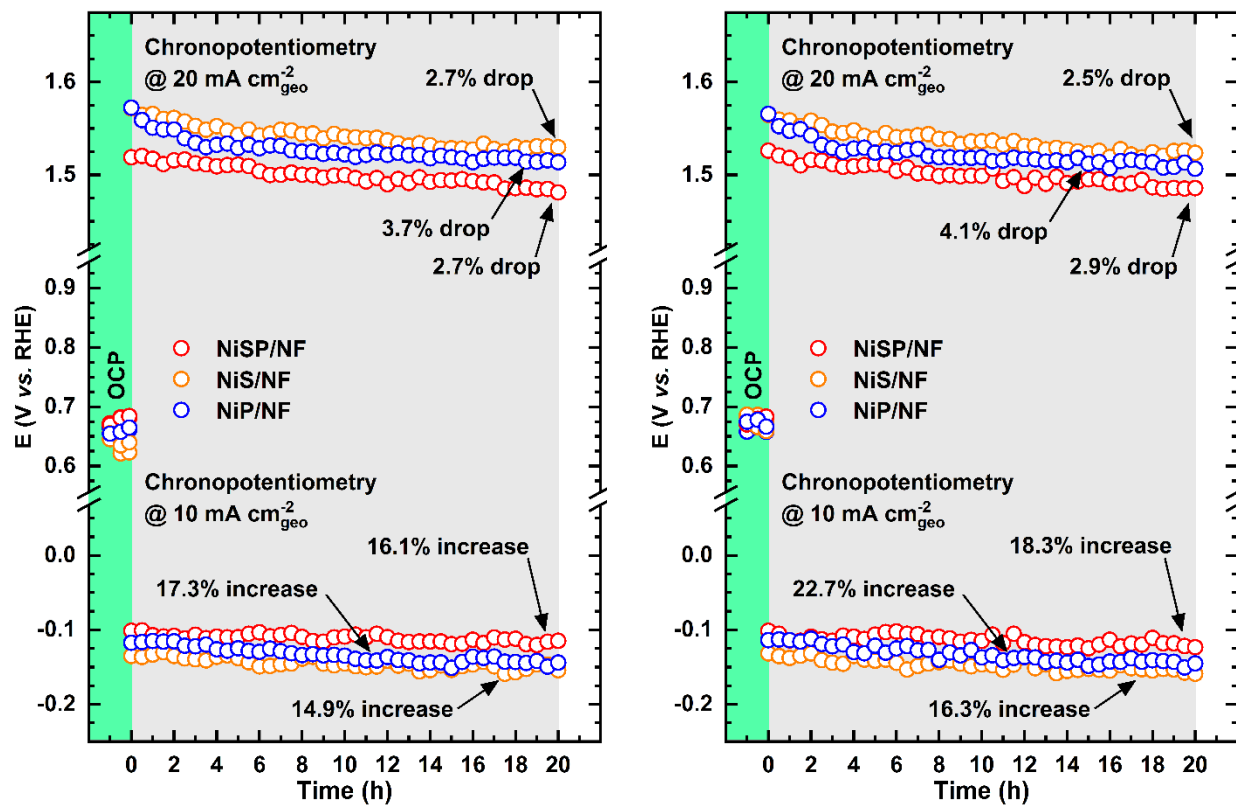

**Figure S12.** Chronopotentiometric replicates at 20 mA·cm<sup>-2</sup> during a period of 20 h in 1 M KOH electrolyte for both the OER (positive potentials) and the HER (negative potentials).

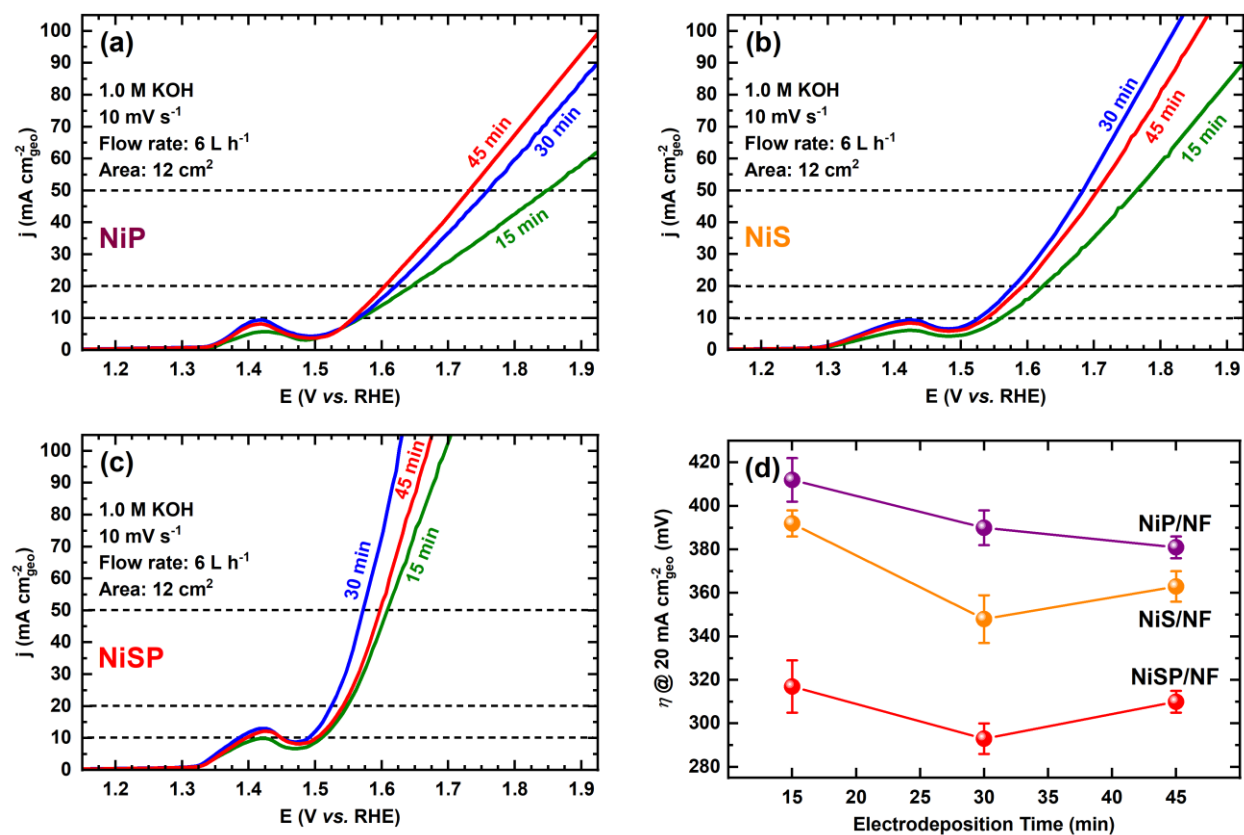

**Figure S13.** Electrodeposition optimization analysis at different deposition times for (a) NiP, (b) NiS and (c) NiSP films. (d) Comparison plot of the observed activity trends at  $20 \text{ mA cm}^{-2}$ .

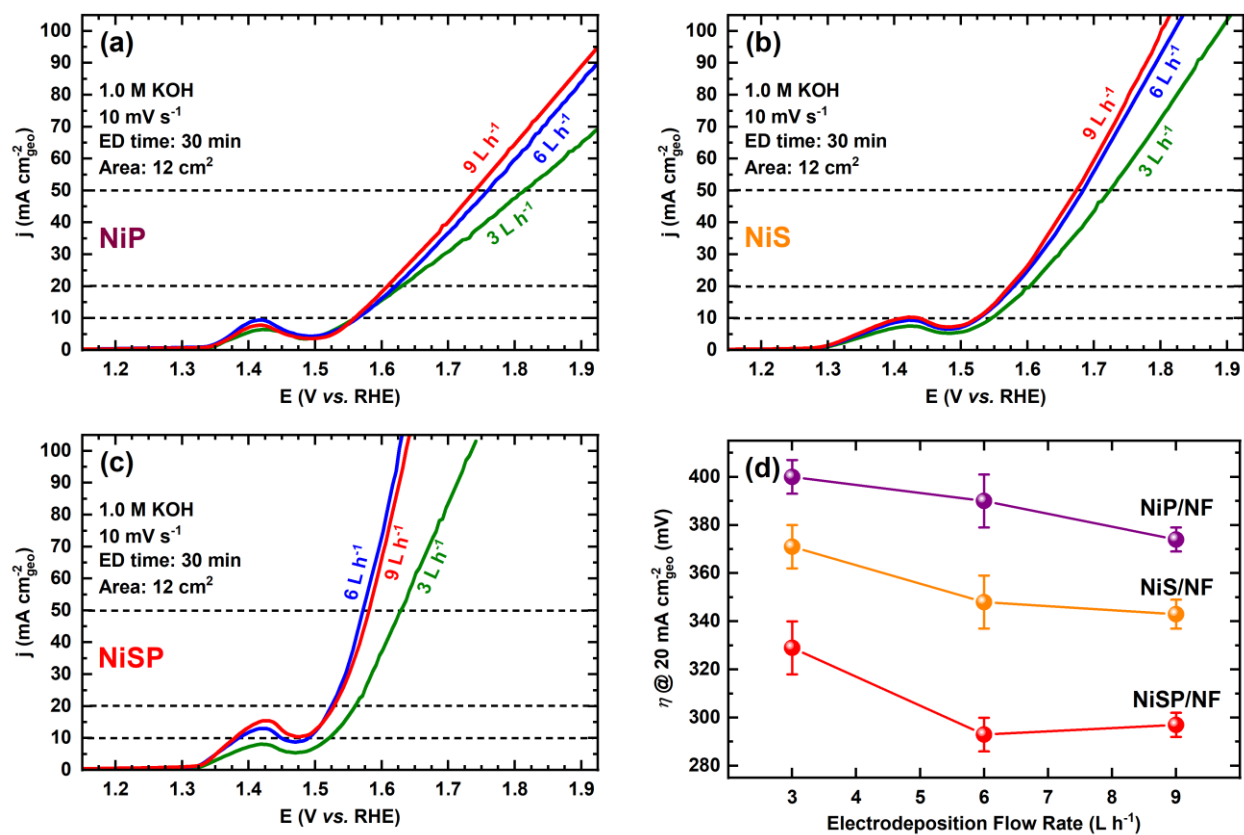

**Figure S14.** Electrodeposition optimization analysis at different volumetric flow rates for (a) NiP, (b) NiS and (c) NiSP films. (d) Comparison plot of the observed activity trends at  $20 \text{ mA cm}^{-2}$ .

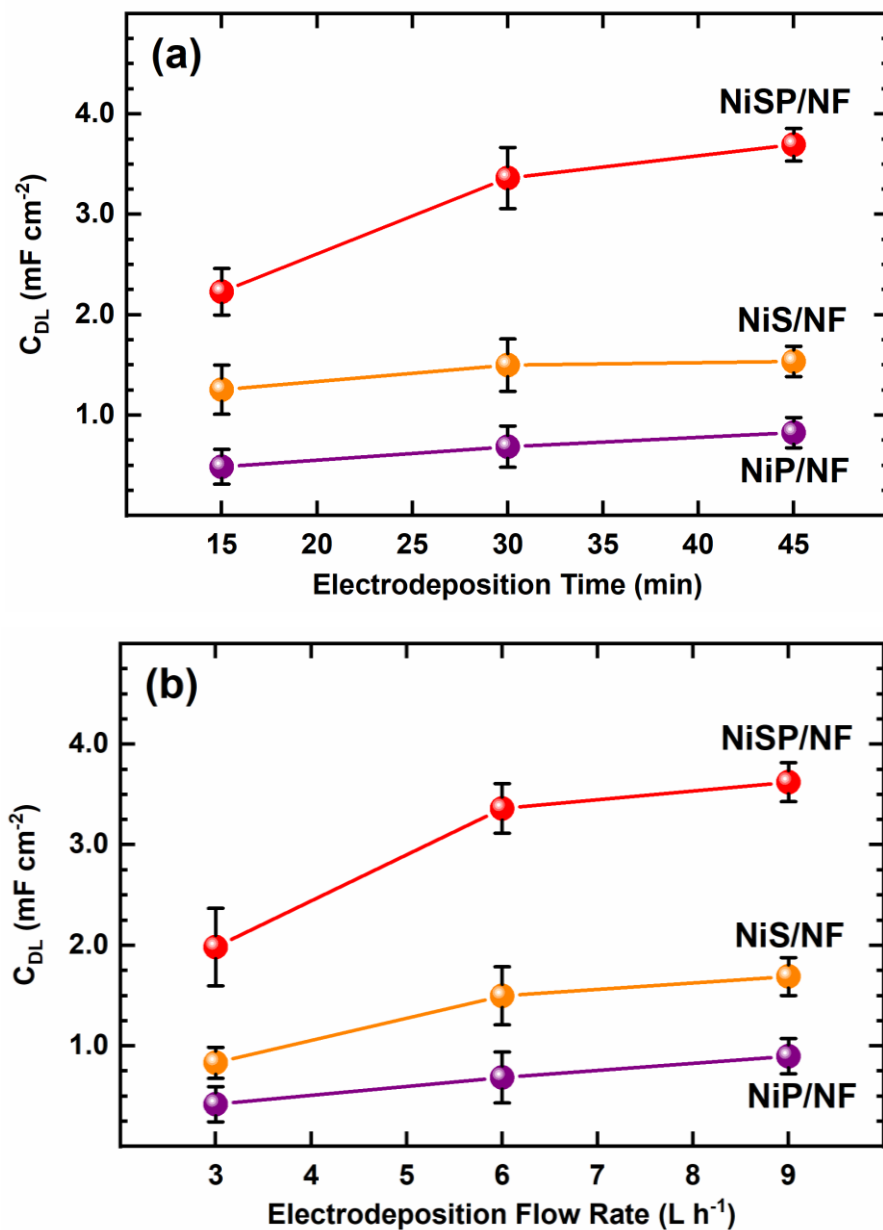

**Figure S15.** Comparison plot of the observed ECSA trends during electrodeposition optimization analysis when varying (a) deposition times and (b) volumetric flow rates. Significant changes were only seen in the NiSP/NF film.

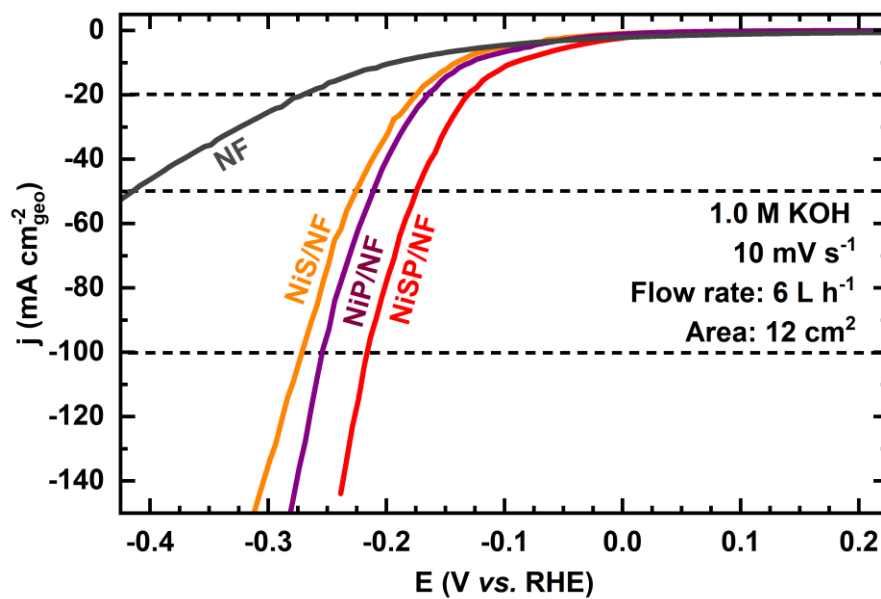

**Figure S16.** HER polarization curves of the as-prepared electrocatalytic films at higher current densities.

**Table S2.** Comparison of the HER performance in alkaline media (1 M KOH) of different S-P electrocatalytic films prepared by electrodeposition.

| Material                                | Substrate    | Mass loading<br>(mg cm <sup>-2</sup> ) | $\eta_{10}$<br>(mV) | $\eta_{50}$<br>(mV) | $\eta_{100}$<br>(mV) | Tafel slope<br>(mV dec <sup>-1</sup> ) | Ref.      |
|-----------------------------------------|--------------|----------------------------------------|---------------------|---------------------|----------------------|----------------------------------------|-----------|
| CoNiP                                   | Ni foam      | -                                      | 111                 | ~180                | ~220                 | 97                                     | 9         |
| Ni-Fe-Co-S                              | Cu foil      | -                                      | 106                 | ~180                | 215                  | 95                                     | 6         |
| Ni-Fe-S                                 | Cu foil      | -                                      | 123                 | ~200                | 235                  | 116                                    | 6         |
| Ni-Co-S                                 | Cu foil      | -                                      | 148                 | ~240                | 281                  | 113                                    | 6         |
| Ni-S                                    | Cu foil      | -                                      | 174                 | ~280                | 336                  | 142                                    | 6         |
| NiCoP                                   | Carbon cloth | -                                      | 218                 | ~375                | ~460                 | -                                      | 1         |
| NiCoP-NiCoSe <sub>2</sub>               | Carbon cloth | 0.073                                  | 196                 | ~300                | ~350                 | -                                      | 1         |
| Ni <sub>0.51</sub> Co <sub>0.49</sub> P | Ni foam      | -                                      | 82                  | ~130                | ~145                 | 43                                     | 4         |
| NiP                                     | Ni foam      | -                                      | ~235                | ~325                | ~345                 | ~135                                   | 4         |
| CoP                                     | Ni foam      | -                                      | ~210                | ~260                | ~275                 | ~77                                    | 4         |
| CoP-MNA                                 | Ni foam      | 6.2                                    | 54                  | ~100                | 121                  | 51                                     | 3         |
| Ni-S-P                                  | Ni foam      | -                                      | 120                 | ~170                | 194                  | 71                                     | 2         |
| Ni-P                                    | Ni foam      | -                                      | 134                 | ~190                | 210                  | 61                                     | 2         |
| Ni-S                                    | Ni foam      | -                                      | 315                 | ~410                | 430                  | 109                                    | 2         |
| NiP <sub>x</sub>                        | Carbon fiber | ~4.3                                   | 118                 | -                   | -                    | 48                                     | 10        |
| NiS                                     | Ni foam      | ~3.1                                   | 143                 | 225                 | 271                  | 115                                    | This work |
| NiP                                     | Ni foam      | ~2.5                                   | 129                 | 210                 | 253                  | 114                                    | This work |
| NiSP                                    | Ni foam      | ~4.8                                   | 93                  | 174                 | 217                  | 107                                    | This work |

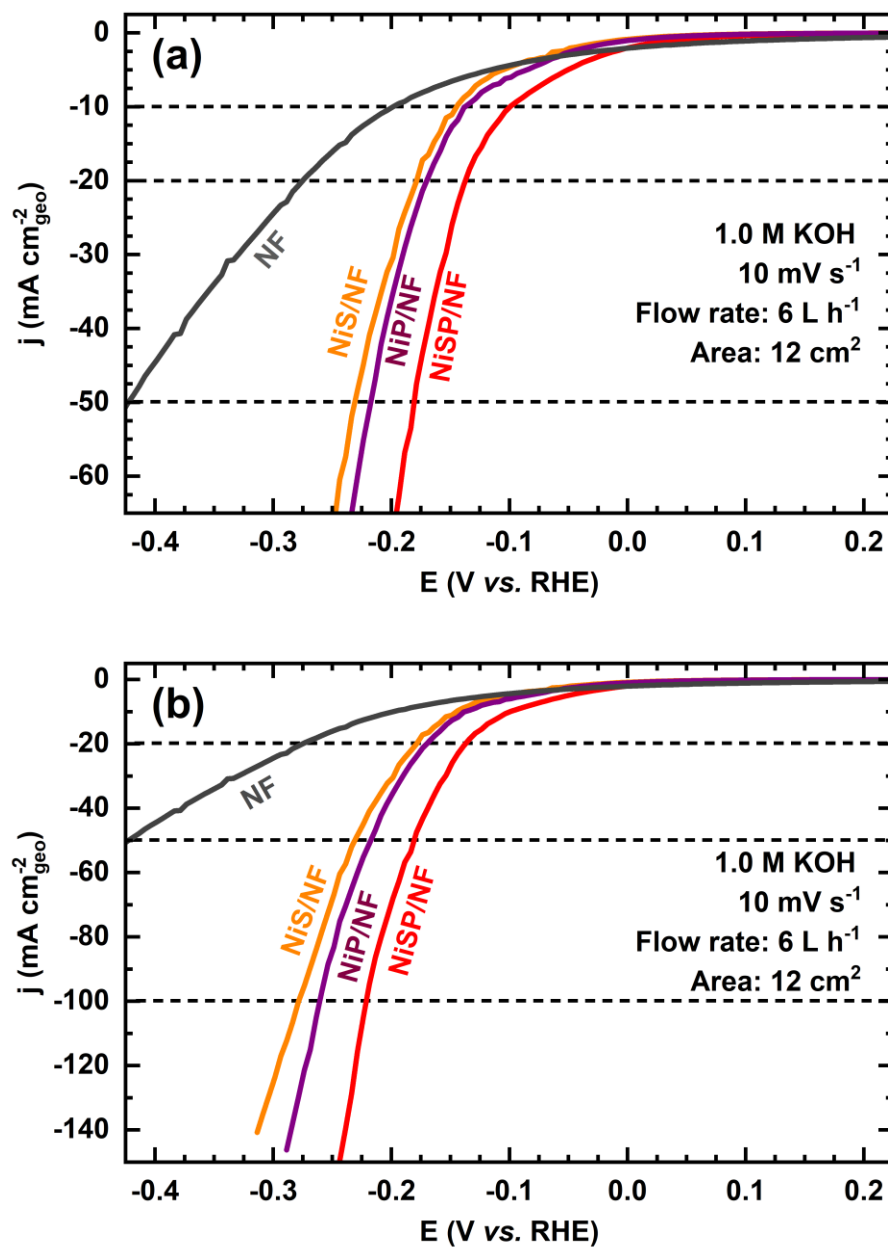

**Figure S17.** HER polarization curves of the evaluated electrocatalytic films after 20 h chronopotentiometric tests at  $-20 \text{ mA cm}^{-2}$ : (a) close-up for low current densities and (b) high current densities.

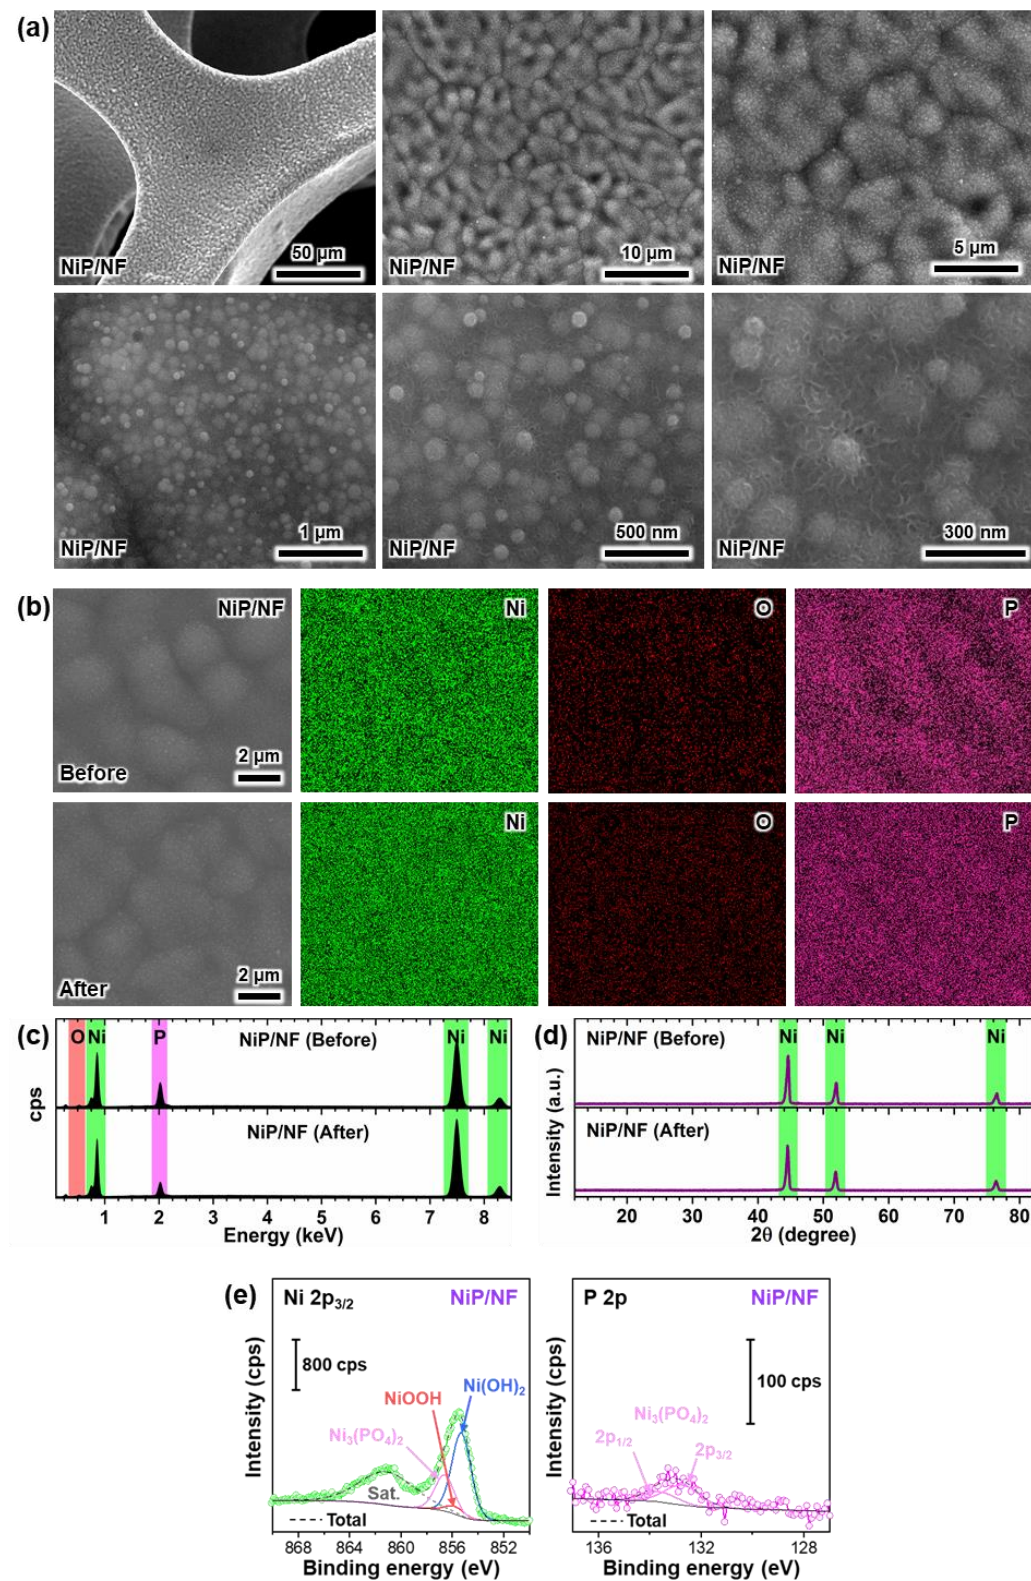

**Figure S18.** Post analysis of the NiP/NF electrode after the OER: (a) SEM images at different magnifications, (b) elemental mapping, (c) EDX spectra and (d) XRD comparison before and after OER tests, (e) XPS results.

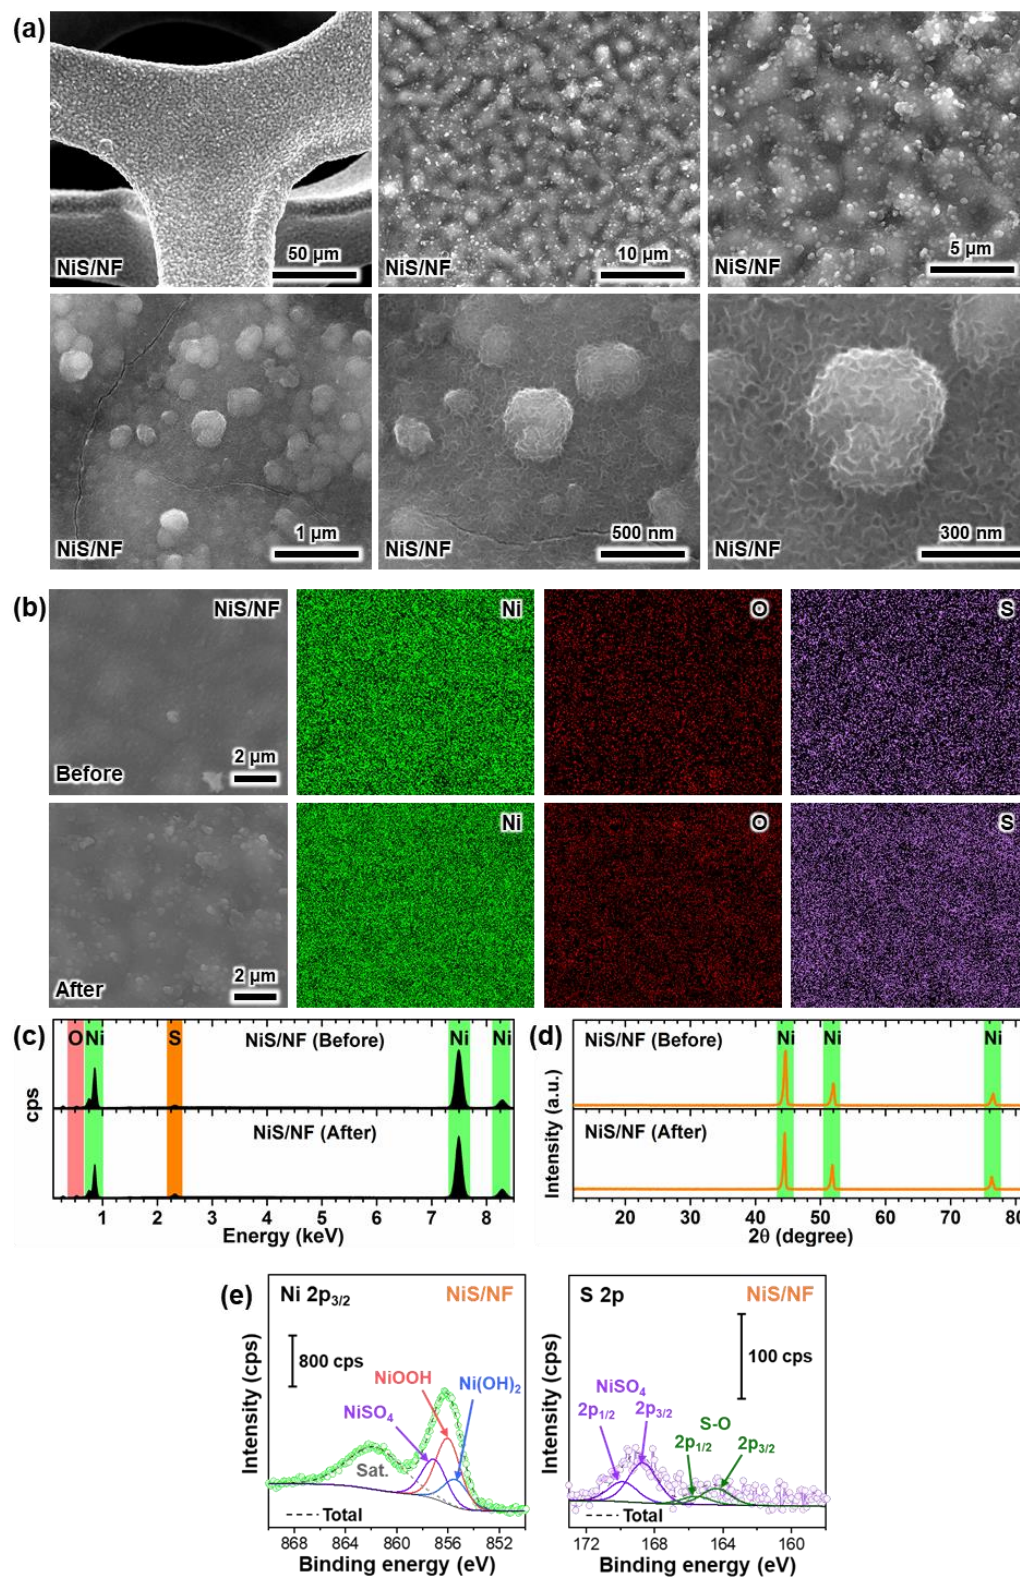

**Figure S19.** Post analysis of the NiS/NF electrode after the OER: (a) SEM images at different magnifications, (b) elemental mapping, (c) EDX spectra and (d) XRD comparison before and after OER tests, (e) XPS results.

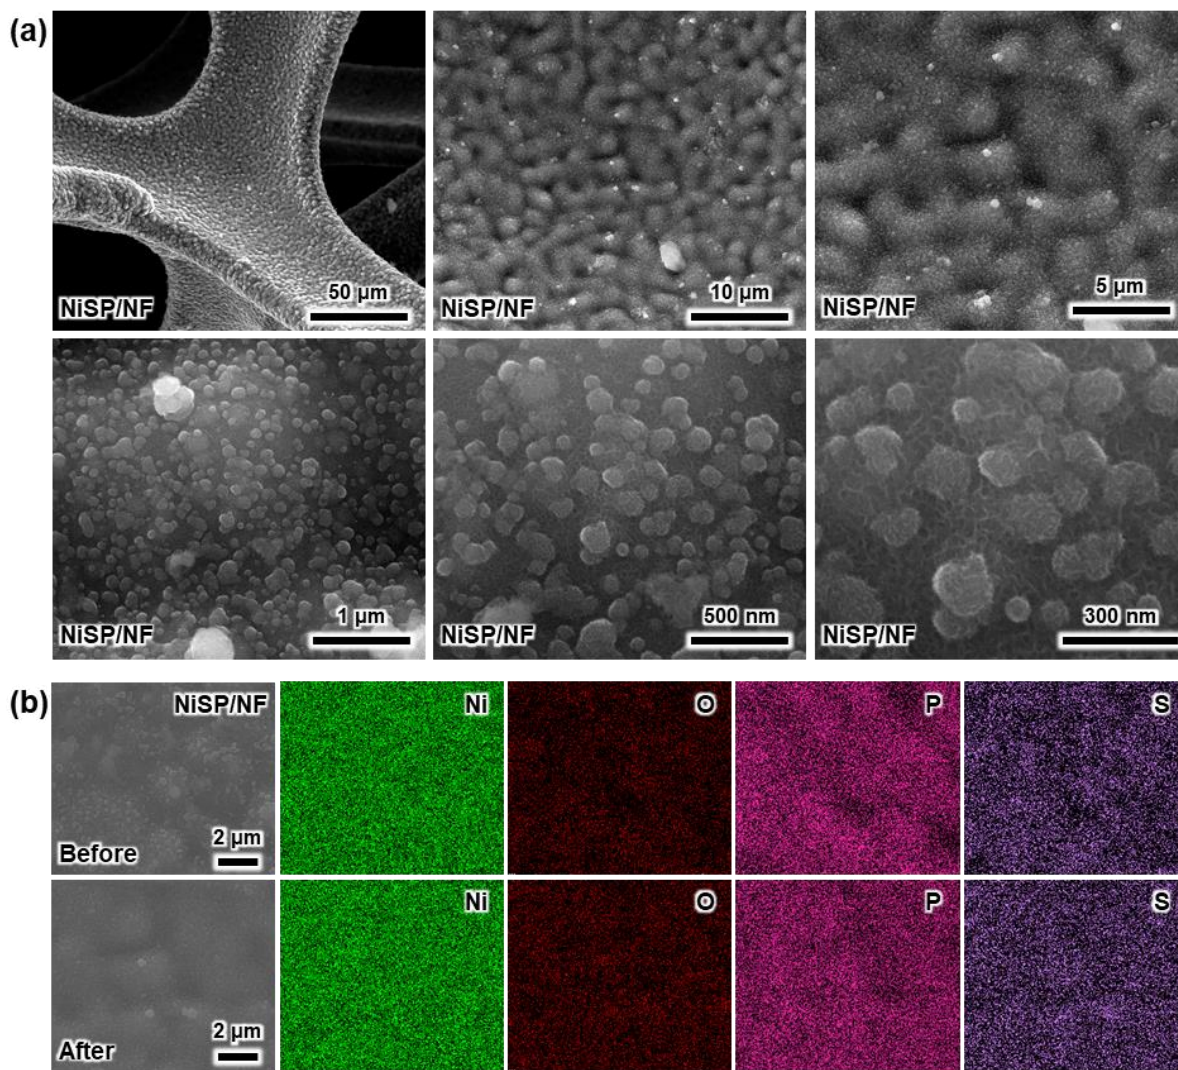

**Figure S20.** Post analysis of the NiSP/NF electrode after the OER: (a) SEM images at different magnifications, (b) elemental mapping before and after OER tests.

**Table S3.** Atomic composition (%) from EDX spectra before and after the OER.

| <b>Element</b> | <b>Before</b> | <b>After</b> |
|----------------|---------------|--------------|
| <b>NiP/NF</b>  |               |              |
| Ni             | 48.81 ± 5.48  | 57.12 ± 5.91 |
| O              | 4.68 ± 0.97   | 8.31 ± 0.69  |
| P              | 14.65 ± 1.47  | 8.85 ± 0.86  |
| <b>NiS/NF</b>  |               |              |
| Ni             | 59.67 ± 6.29  | 61.80 ± 6.30 |
| O              | 5.12 ± 0.88   | 7.87 ± 1.25  |
| S              | 1.20 ± 0.18   | 2.24 ± 0.48  |
| <b>NiSP/NF</b> |               |              |
| Ni             | 51.54 ± 5.68  | 49.25 ± 5.66 |
| O              | 6.97 ± 1.10   | 8.91 ± 0.60  |
| P              | 12.05 ± 1.21  | 9.29 ± 0.99  |
| S              | 1.93 ± 0.25   | 1.79 ± 0.25  |

**Table S4.** Concentration (in ppm) of dissolved elements in the KOH electrolyte before and after stability experiments determined by TXRF measurements.

| <b>Element</b>                                                    | <b>Before OER</b> | <b>After OER</b> | <b>Before HER</b> | <b>After HER</b> |
|-------------------------------------------------------------------|-------------------|------------------|-------------------|------------------|
| <b>NiP/NF</b>                                                     |                   |                  |                   |                  |
| Ni                                                                | 0.318             | 0.431            | 0.254             | 0.370            |
| Fe                                                                | Not det.          | Not det.         | Not det.          | Not det.         |
| P                                                                 | Not det.          | 0.689            | Not det.          | 0.992            |
| <b>NiS/NF</b>                                                     |                   |                  |                   |                  |
| Ni                                                                | 0.402             | 0.716            | 0.521             | 0.444            |
| Fe                                                                | Not det.          | Not det.         | Not det.          | Not det.         |
| S                                                                 | Not det.          | Not det.         | Not det.          | 0.841            |
| <b>NiSP/NF</b>                                                    |                   |                  |                   |                  |
| Ni                                                                | 0.360             | 0.560            | 0.483             | 0.441            |
| Fe                                                                | Not det.          | Not det.         | Not det.          | Not det.         |
| P                                                                 | Not det.          | 0.485            | Not det.          | 0.892            |
| S                                                                 | Not det.          | Not det.         | Not det.          | 0.937            |
| Limits of detection: Ni (0.022), P (0.330), S (0.800), Fe (0.024) |                   |                  |                   |                  |

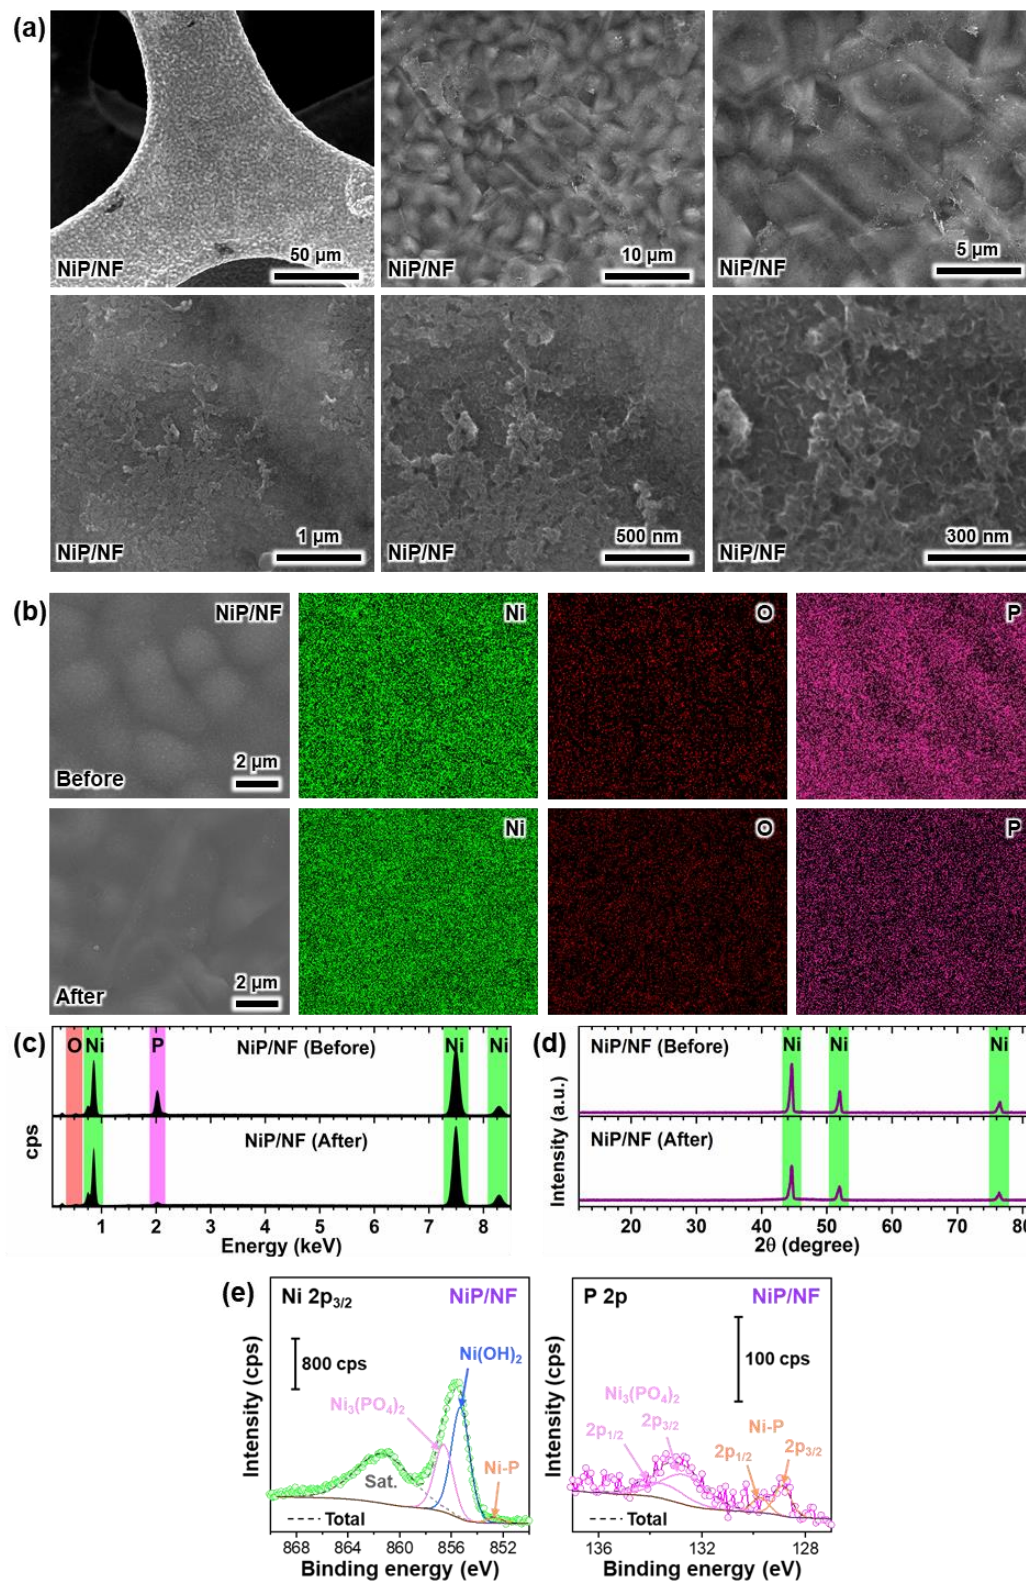

**Figure S21.** Post analysis of the NiP/NF electrode after HER: (a) SEM images at different magnifications, (b) elemental mapping, (c) EDX spectra and (d) XRD comparison before and after HER tests, (e) XPS results.

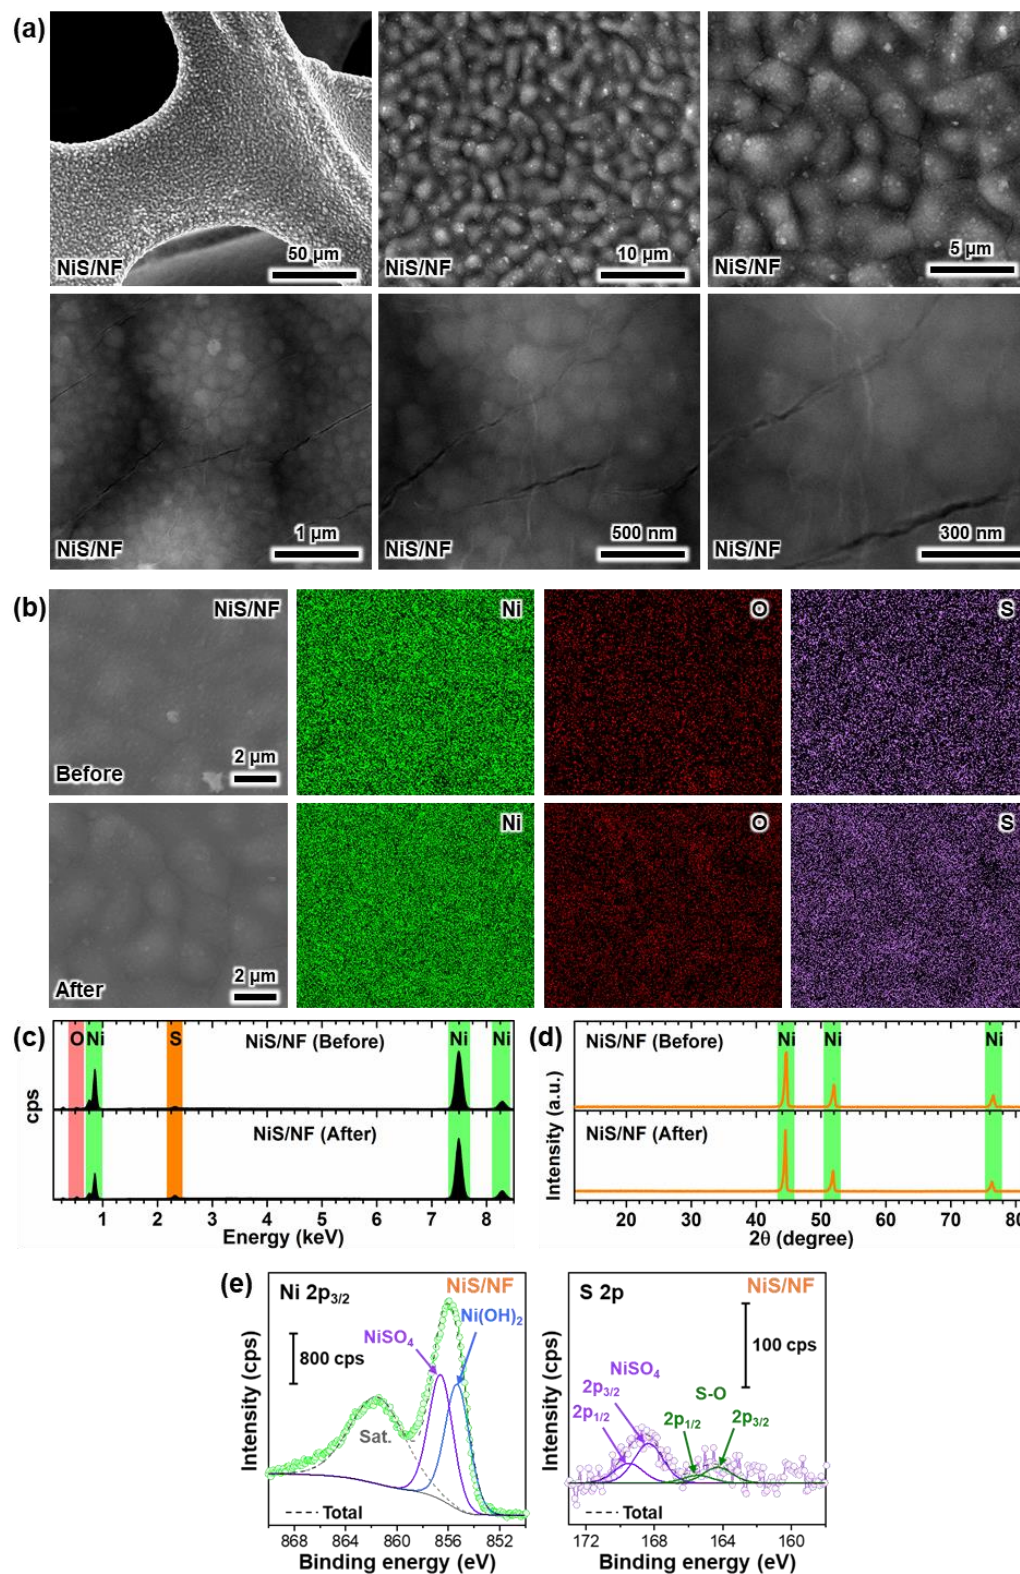

**Figure S22.** Post analysis of the NiS/NF electrode after HER: (a) SEM images at different magnifications, (b) elemental mapping, (c) EDX spectra and (d) XRD comparison before and after HER tests, (e) XPS results.

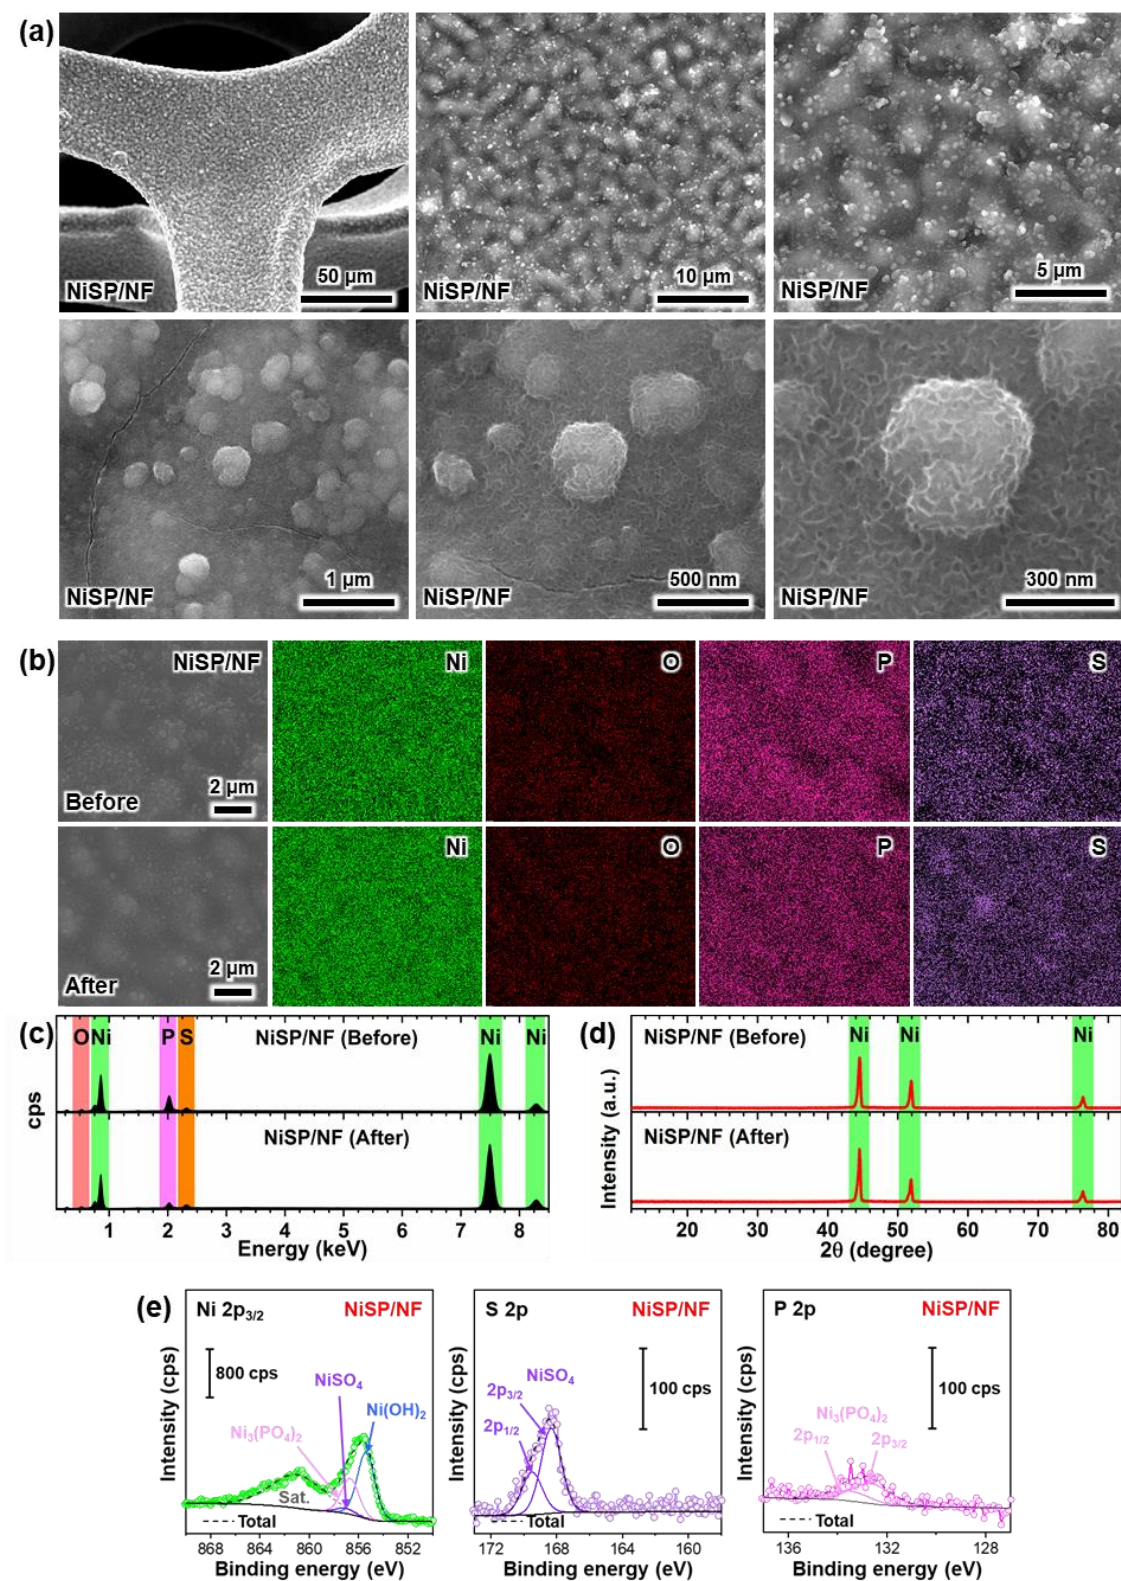

**Figure S23.** Post analysis of the NiSP/NF electrode after HER: (a) SEM images at different magnifications, (b) elemental mapping, (c) EDX spectra and (d) XRD comparison before and after HER tests, (e) XPS results.

**Table S5.** Atomic composition (%) from EDX spectra before and after HER.

| <b>Element</b> | <b>Before</b> | <b>After</b> |
|----------------|---------------|--------------|
| <b>NiP/NF</b>  |               |              |
| Ni             | 48.81 ± 5.48  | 69.09 ± 8.21 |
| O              | 4.68 ± 0.97   | 2.36 ± 0.71  |
| P              | 14.65 ± 1.47  | 1.53 ± 0.24  |
| <b>NiS/NF</b>  |               |              |
| Ni             | 59.67 ± 6.29  | 65.69 ± 6.66 |
| O              | 5.12 ± 0.88   | 6.00 ± 1.48  |
| S              | 1.20 ± 0.18   | 2.04 ± 0.53  |
| <b>NiSP/NF</b> |               |              |
| Ni             | 51.54 ± 5.68  | 61.99 ± 6.49 |
| O              | 6.97 ± 1.07   | 4.19 ± 1.03  |
| P              | 12.05 ± 1.21  | 4.59 ± 0.48  |
| S              | 1.93 ± 0.25   | 2.25 ± 0.27  |

**Table S6.** Comparison of overall water splitting performance in alkaline media (1 M KOH) of different S-P electrocatalytic films prepared by electrodeposition.

| Electrode couple                        | Substrate    | Cell voltage<br>(V @ 10 mA cm <sup>-2</sup> ) | Cell voltage<br>(V @ 100 mA cm <sup>-2</sup> ) | Ref.      |
|-----------------------------------------|--------------|-----------------------------------------------|------------------------------------------------|-----------|
| Ni-S-P  Ni-S-P                          | Ni foam      | 1.58                                          | ~1.79                                          | 2         |
| Ni-S  Ni-S                              | Ni foam      | 1.75                                          | ~2.10                                          | 2         |
| Ni-P  Ni-P                              | Ni foam      | 1.63                                          | ~1.88                                          | 2         |
| NiCoP–NiCoSe <sub>2</sub>               | Carbon cloth | 1.70                                          | ~2.07                                          | 1         |
| Ni <sub>0.51</sub> Co <sub>0.49</sub> P | Ni foam      | 1.57                                          | ~1.70                                          | 4         |
| NiP  NiP                                | Ni foam      | ~1.69                                         | ~1.87                                          | 4         |
| CoP  CoP                                | Ni foam      | ~1.63                                         | ~1.77                                          | 4         |
| CoNiP  CoNiP                            | Ni foam      | 1.61                                          | ~1.95                                          | 9         |
| CoP-MNA  CoP-MNA                        | Ni foam      | 1.62                                          | -                                              | 3         |
| Ni-P  Ni-P                              | Carbon fiber | 1.63                                          | 2.50                                           | 5         |
| NiP <sub>x</sub>   NiP <sub>x</sub>     | Carbon fiber | 1.61                                          | -                                              | 10        |
| Ni-Fe-Co-S  Ni-Fe-Co-S                  | Cu foil      | 1.54                                          | -                                              | 6         |
| Ni-Co-S   Ni-Co-S                       | Cu foil      | ~1.62                                         | -                                              | 6         |
| Ni-Fe-S   Ni-Fe-S                       | Cu foil      | ~1.56                                         | -                                              | 6         |
| Ni-S  Ni-S                              | Cu foil      | ~1.70                                         | -                                              | 6         |
| NiSP  NiSP                              | Ni foam      | 1.70                                          | 1.85                                           | This work |

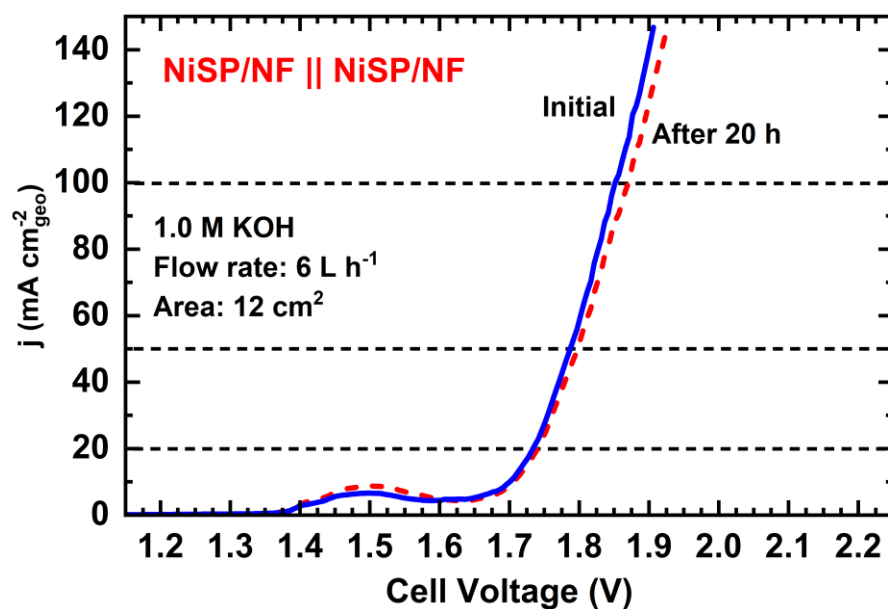

**Figure S24.** Overall water splitting polarization curves before and after galvanostatic runs at 10 mA·cm<sup>-2</sup> during a period of 20 h.

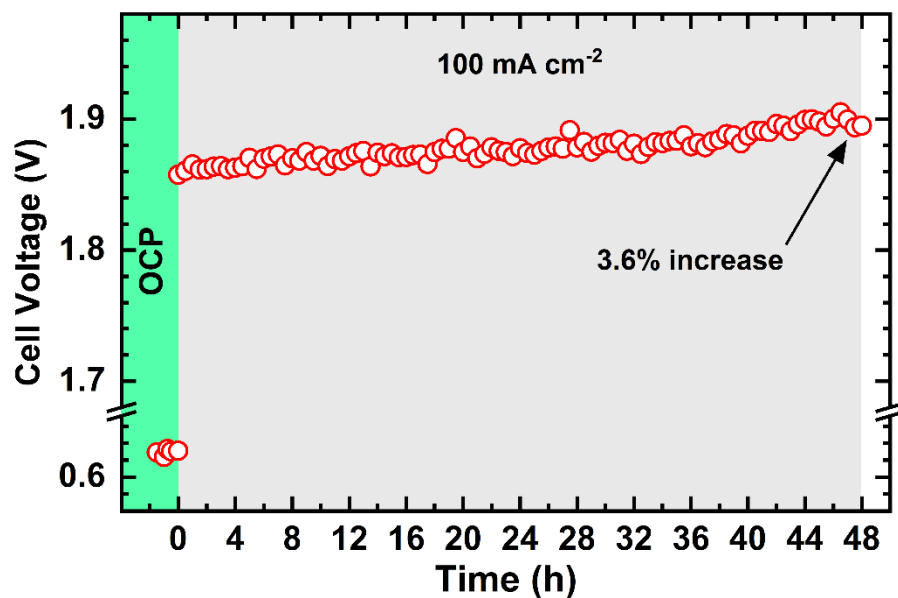

**Figure S25.** Long-term electrolysis test at  $100 \text{ mA} \cdot \text{cm}^{-2}$  during a period of 48 h. Note: the experiment was performed using a power supply to withstand the high current (1 A) for two days. Fluctuation is attributed to the intense bubbling at high current densities.

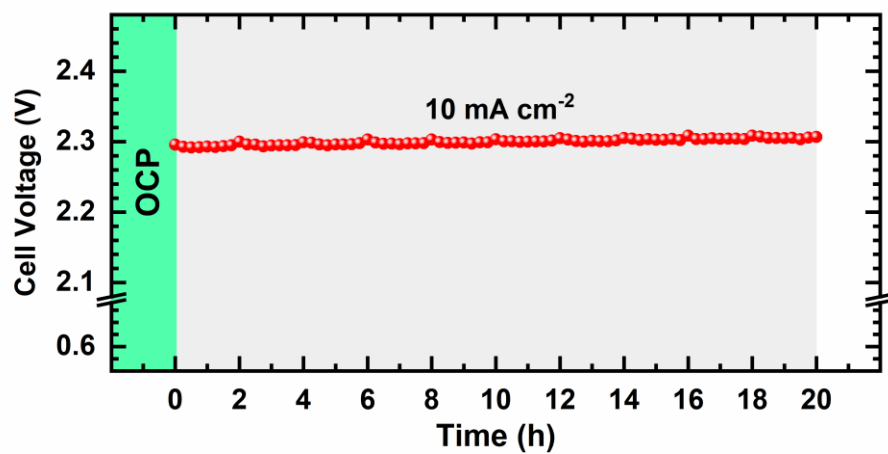

**Figure S26.** Chronopotentiometric run during gas evolution test at  $10 \text{ mA} \cdot \text{cm}^{-2}$  during a period of 20 h.

## References

- (1) Wang, T.; Liu, X.; Yan, Z.; Teng, Y.; Li, R.; Zhang, J.; Peng, T. Facile Preparation Process of NiCoP–NiCoSe<sub>2</sub> Nano-Bilayer Films for Oxygen Evolution Reaction with High Efficiency and Long Duration. *ACS Sustain. Chem. Eng.* **2020**, *8* (2), 1240–1251. <https://doi.org/10.1021/acssuschemeng.9b06514>.
- (2) Xu, Q.; Gao, W.; Wang, M.; Yuan, G.; Ren, X.; Zhao, R.; Zhao, S.; Wang, Q. Electrodeposition of NiS/Ni<sub>2</sub>P Nanoparticles Embedded in Amorphous Ni(OH)<sub>2</sub> Nanosheets as an Efficient and Durable Dual-Functional Electrocatalyst for Overall Water Splitting. *Int. J. Hydrogen Energy* **2020**, *45* (4), 2546–2556. <https://doi.org/10.1016/j.ijhydene.2019.11.217>.
- (3) Zhu, Y.-P.; Liu, Y.-P.; Ren, T.-Z.; Yuan, Z.-Y. Self-Supported Cobalt Phosphide Mesoporous Nanorod Arrays: A Flexible and Bifunctional Electrode for Highly Active Electrocatalytic Water Reduction and Oxidation. *Adv. Funct. Mater.* **2015**, *25* (47), 7337–7347. <https://doi.org/10.1002/adfm.201503666>.
- (4) Yu, J.; Li, Q.; Li, Y.; Xu, C.-Y.; Zhen, L.; Dravid, V. P.; Wu, J. Ternary Metal Phosphide with Triple-Layered Structure as a Low-Cost and Efficient Electrocatalyst for Bifunctional Water Splitting. *Adv. Funct. Mater.* **2016**, *26* (42), 7644–7651. <https://doi.org/10.1002/adfm.201603727>.
- (5) Wang, X.; Li, W.; Xiong, D.; Petrovykh, D. Y.; Liu, L. Bifunctional Nickel Phosphide Nanocatalysts Supported on Carbon Fiber Paper for Highly Efficient and Stable Overall Water Splitting. *Adv. Funct. Mater.* **2016**, *26* (23), 4067–4077. <https://doi.org/10.1002/adfm.201505509>.
- (6) Darband, G. B.; Aliofkhazraei, M.; Hyun, S.; Rouhaghdam, A. S.; Shanmugam, S. Electrodeposition of Ni–Co–Fe Mixed Sulfide Ultrathin Nanosheets on Ni Nanocones: A Low-Cost, Durable and High Performance Catalyst for Electrochemical Water Splitting. *Nanoscale* **2019**, *11* (35), 16621–16634. <https://doi.org/10.1039/C9NR04529E>.
- (7) Liu, T.; Liang, Y.; Liu, Q.; Sun, X.; He, Y.; Asiri, A. M. Electrodeposition of Cobalt-Sulfide Nanosheets Film as an Efficient Electrocatalyst for Oxygen Evolution Reaction. *Electrochem. Commun.* **2015**, *60*, 92–96. <https://doi.org/10.1016/j.elecom.2015.08.011>.
- (8) Liu, B.; Qu, S.; Kou, Y.; Liu, Z.; Chen, X.; Wu, Y.; Han, X.; Deng, Y.; Hu, W.; Zhong, C. In Situ Electrodeposition of Cobalt Sulfide Nanosheet Arrays on Carbon Cloth as a Highly Efficient Bifunctional Electrocatalyst for Oxygen Evolution and Reduction Reactions. *ACS Appl. Mater. Interfaces* **2018**, *10* (36), 30433–30440. <https://doi.org/10.1021/acsami.8b10645>.
- (9) Zhou, L.; Jiang, S.; Liu, Y.; Shao, M.; Wei, M.; Duan, X. Ultrathin CoNiP@Layered Double Hydroxides Core–Shell Nanosheets Arrays for Largely Enhanced Overall Water Splitting. *ACS Appl. Energy Mater.* **2018**, *1* (2), 623–631. <https://doi.org/10.1021/acsaem.7b00151>.
- (10) Zhang, Z.; Liu, S.; Xiao, J.; Wang, S. Fiber-Based Multifunctional Nickel Phosphide Electrodes for Flexible Energy Conversion and Storage. *J. Mater. Chem. A* **2016**, *4* (24), 9691–9699. <https://doi.org/10.1039/C6TA03732A>.
- (11) Chiu, C.-W.; Sun, I.-W.; Chen, P.-Y. Electrodeposition and Characterization of CoP Compounds Produced from the Hydrophilic Room-Temperature Ionic Liquid 1-Butyl-1-Methylpyrrolidinium Dicyanamide. *J. Electrochem. Soc.* **2017**, *164* (8), H5018. <https://doi.org/10.1149/2.0041708jes>.
